# Supplementary material for: Characterization of the Jomthonic Acids Biosynthesis Pathway and Isolation of Novel Analogues in Streptomyces caniferus GUA-06-05-006A
Source: Mar Drugs. 2018 Jul 31;16(8):259. doi: 10.3390/md16080259 (PMC6117699; doi:10.3390/md16080259)

| <b>Table of contents</b>                                                         | <b>Pages</b> |
|----------------------------------------------------------------------------------|--------------|
| <b>Figures S1-S5.</b> 1D and 2D NMR spectra of <b>1</b> in CDCl <sub>3</sub>     | 2-6          |
| <b>Figures S6-S11.</b> 1D and 2D NMR spectra of <b>2</b> in CDCl <sub>3</sub> .  | 7-12         |
| <b>Figures S12-S18.</b> 1D and 2D NMR spectra of <b>3</b> in CDCl <sub>3</sub> . | 13-19        |
| <b>Figures S19-S21.</b> HRESIMS of <b>1-3</b> .                                  | 20-22        |

**Figure S1.**  $^1\text{H}$  NMR (500 MHz) Spectrum of Compound **1** in  $\text{CDCl}_3$

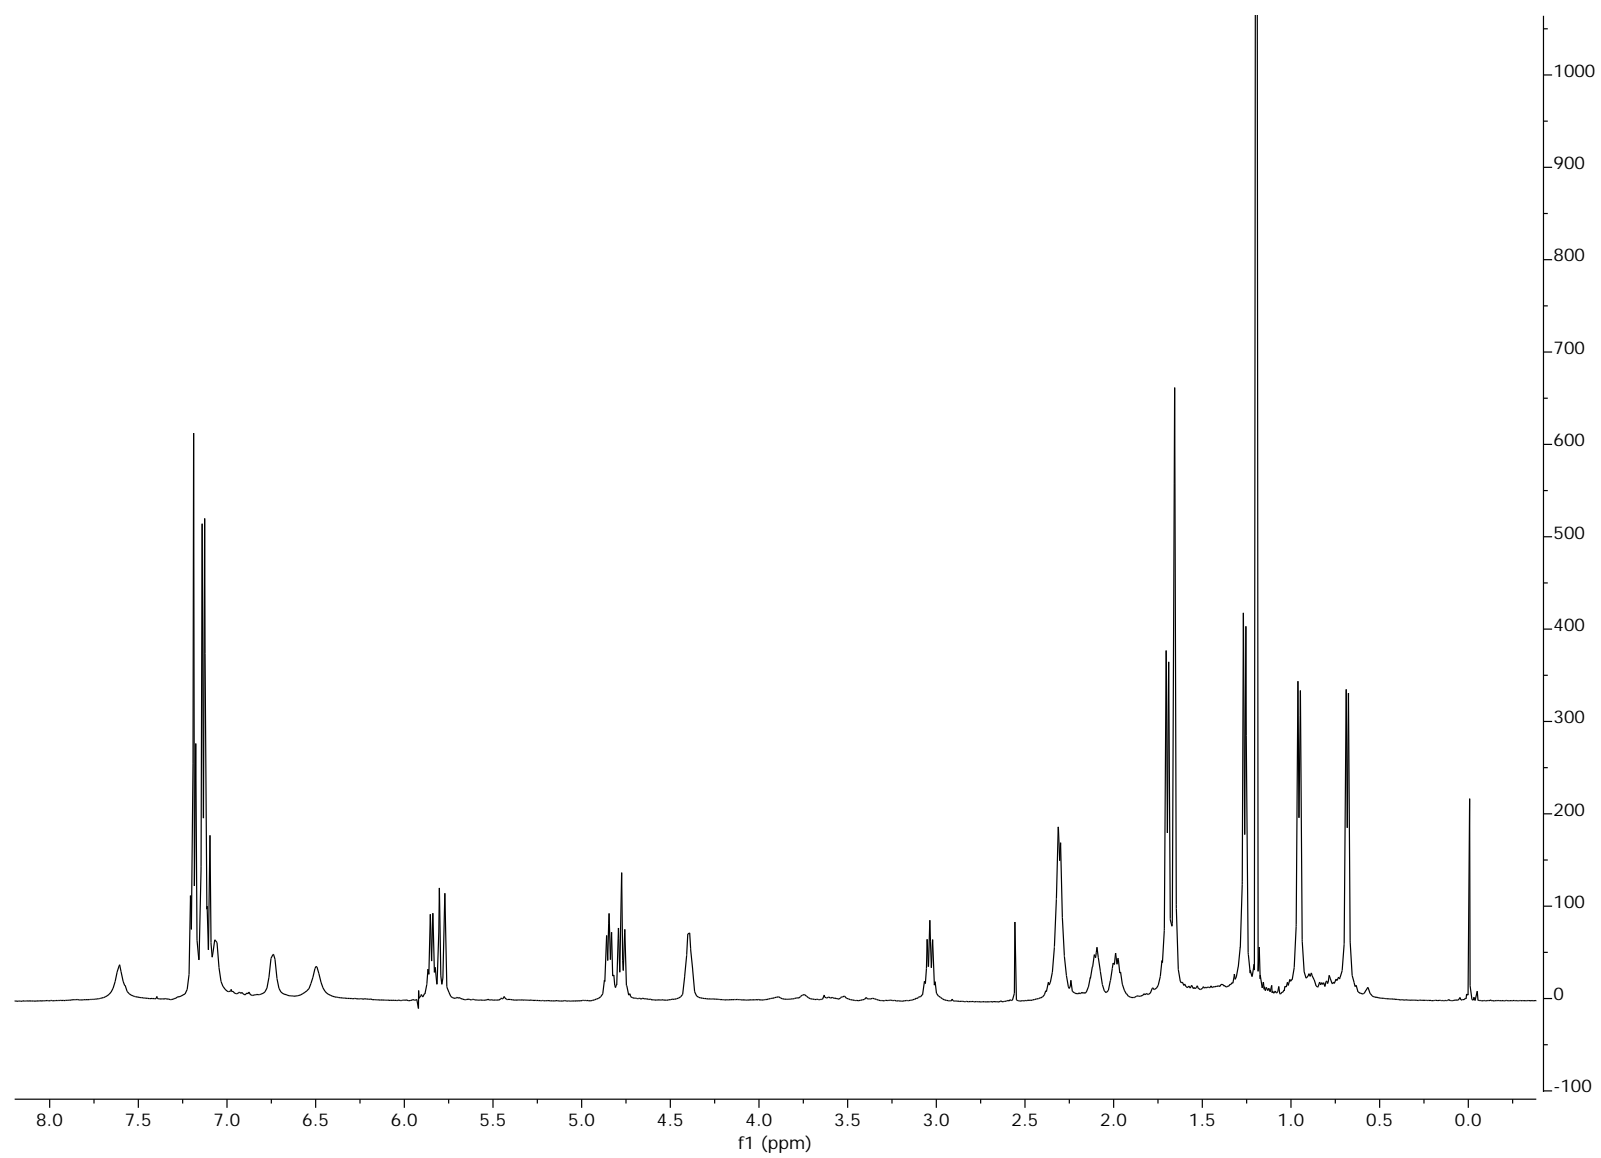

**Figure S2.** gCOSY (500 MHz) Spectrum of Compound **1** in CDCl<sub>3</sub>

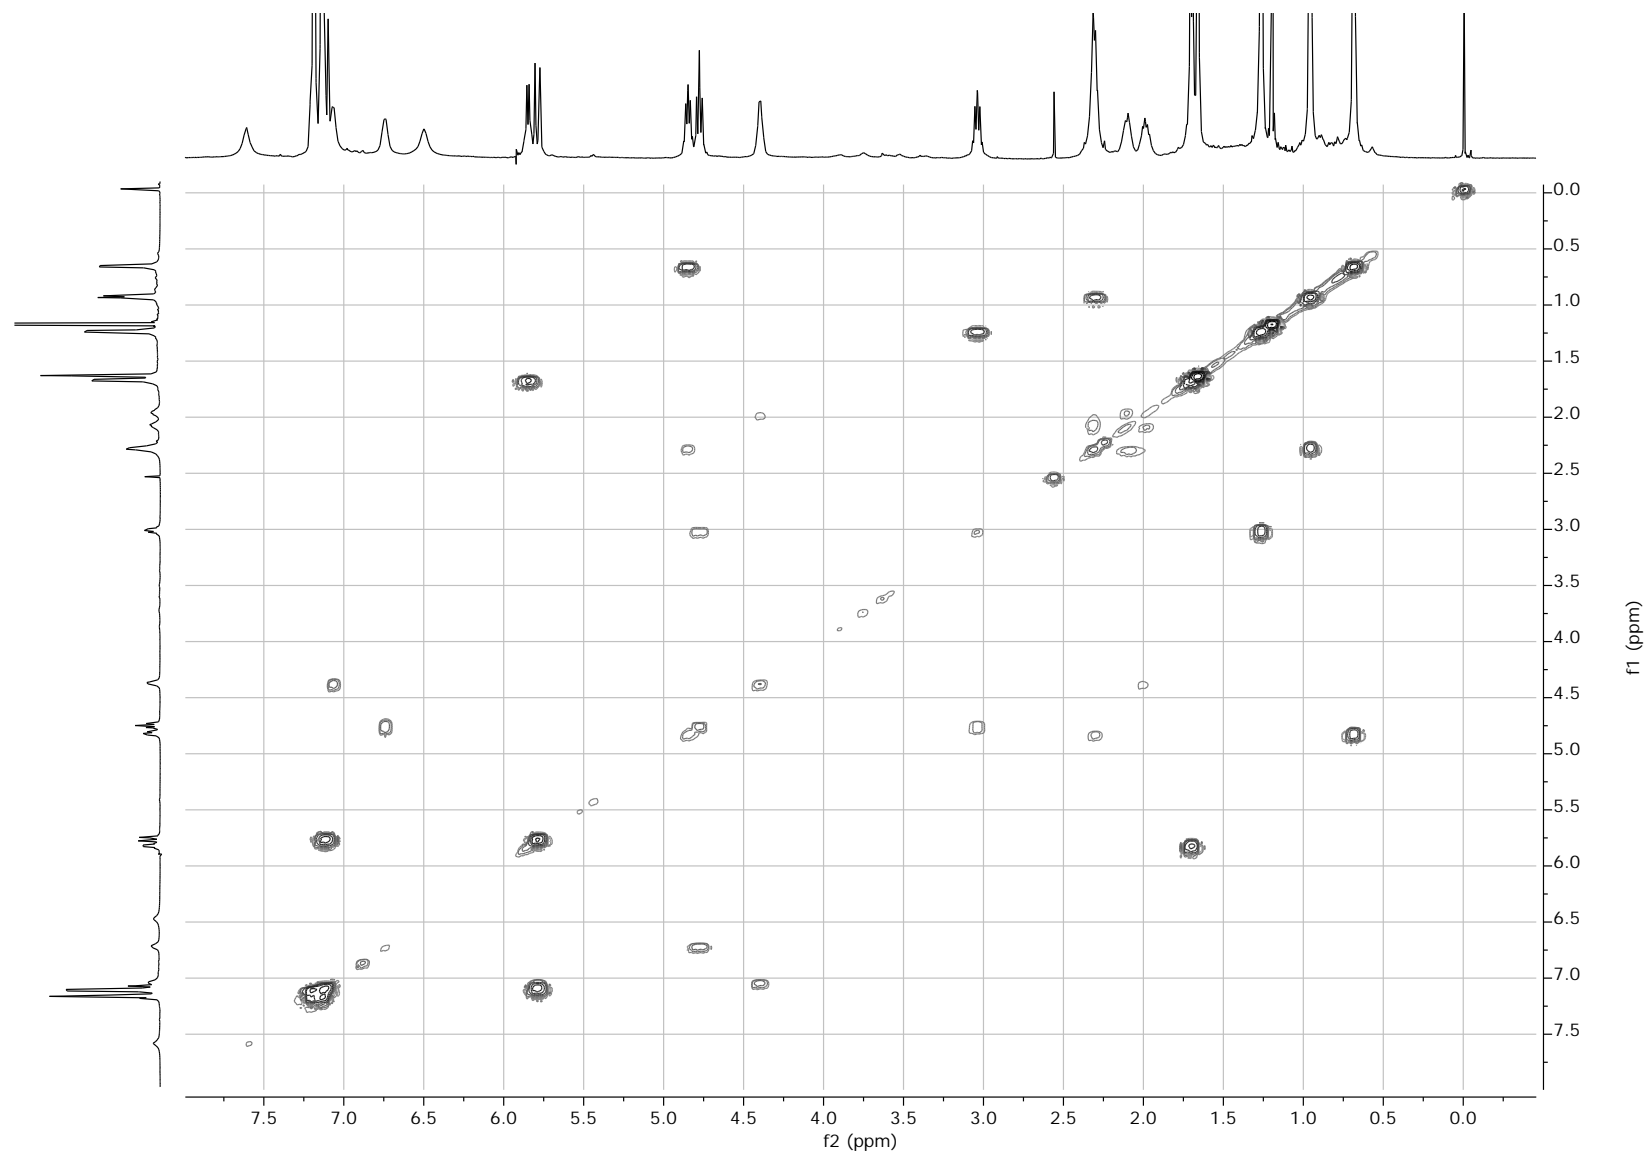

**Figure S3.** gHSQC (500 MHz) Spectrum of Compound **1** in CDCl<sub>3</sub>

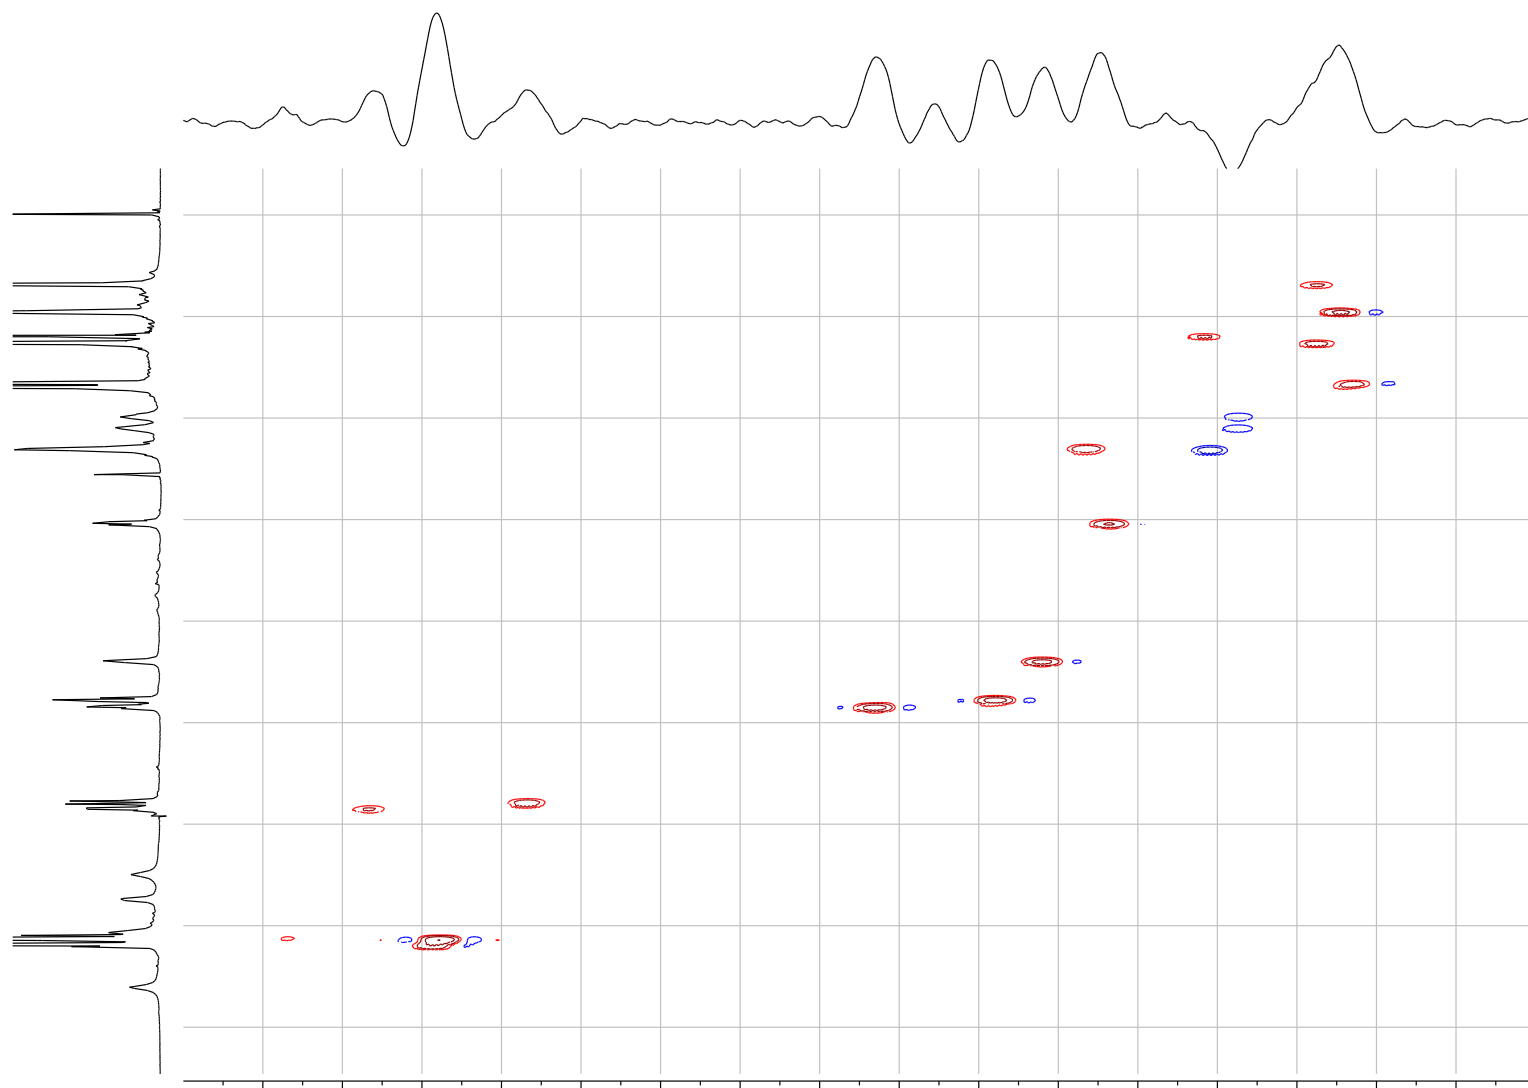

**Figure S4.** gHMBC (500 MHz) Spectrum of Compound **1** in CDCl<sub>3</sub>

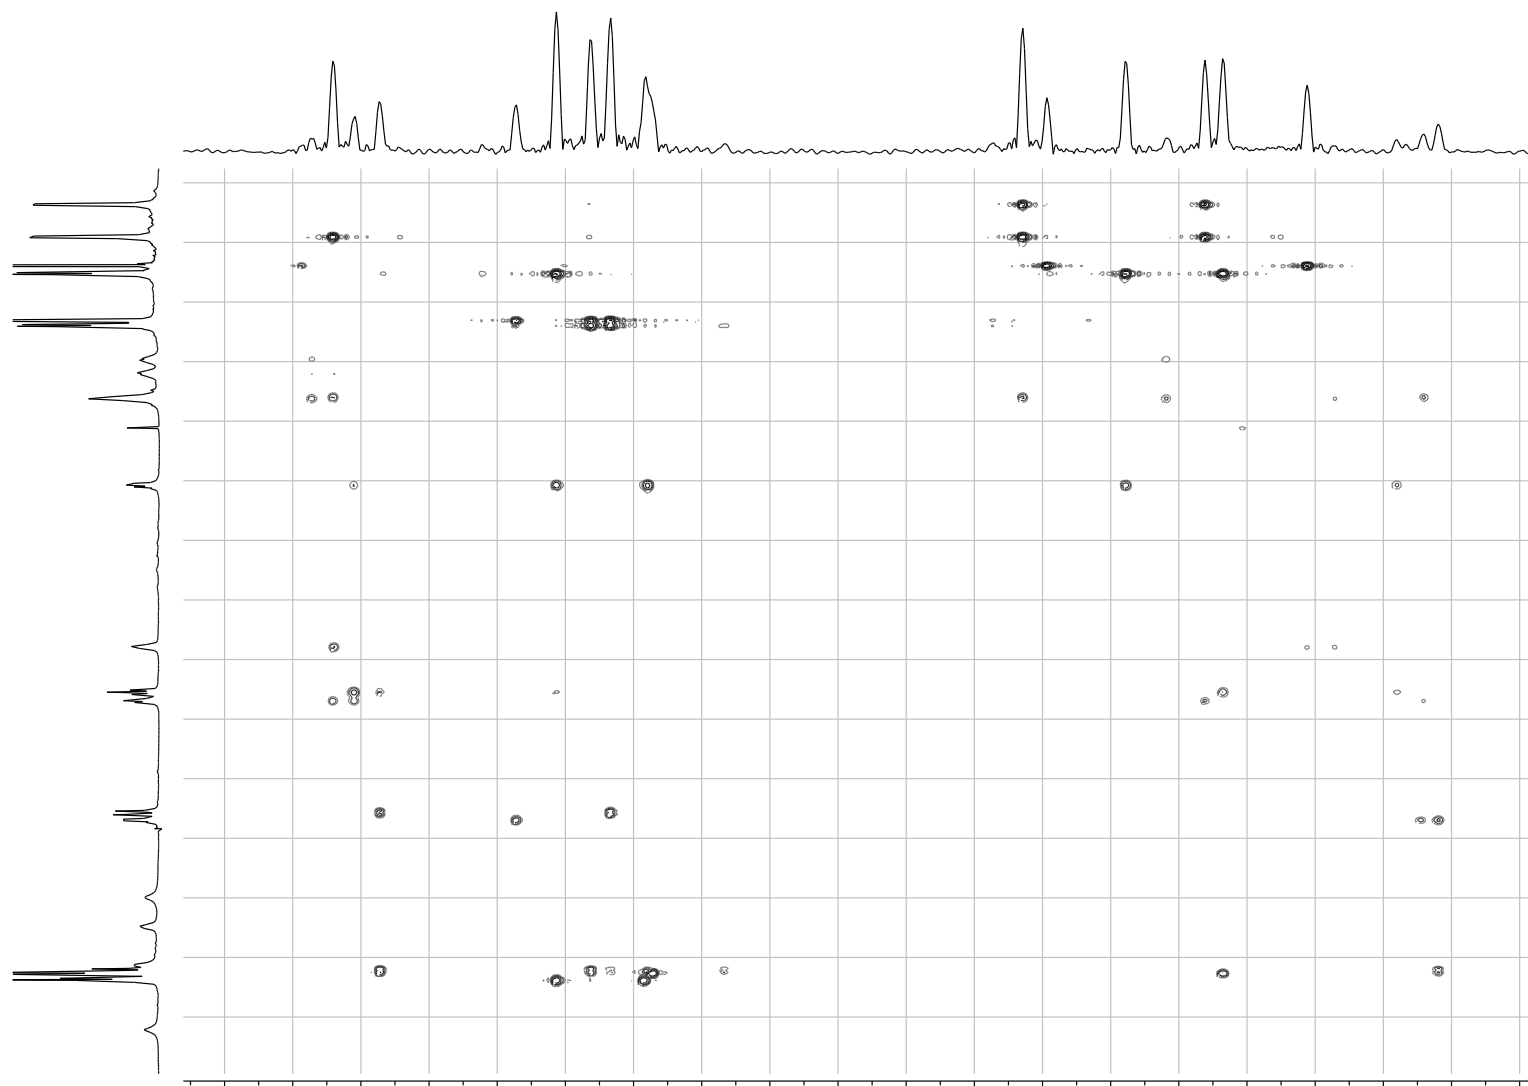

**Figure S5.** ROESY (500 MHz) Spectrum of Compound **1** in CDCl<sub>3</sub>

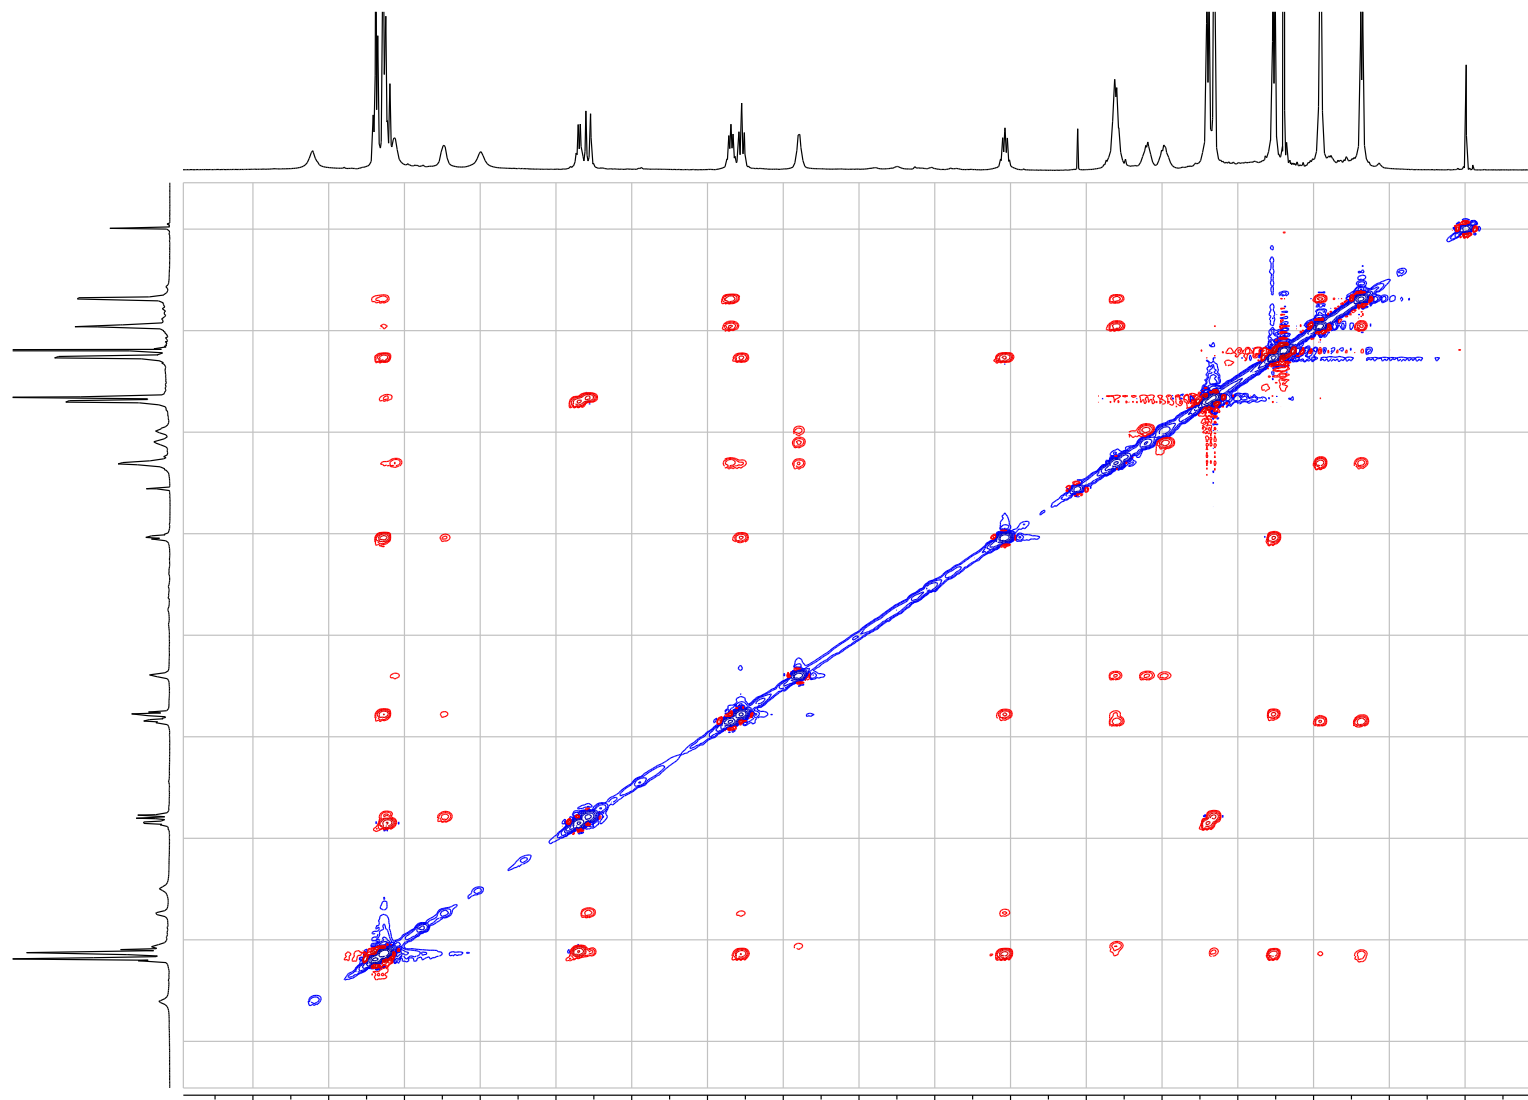

**Figure S6.**  $^1\text{H}$  NMR (400 MHz) Spectrum of Compound **2** in  $\text{CDCl}_3$

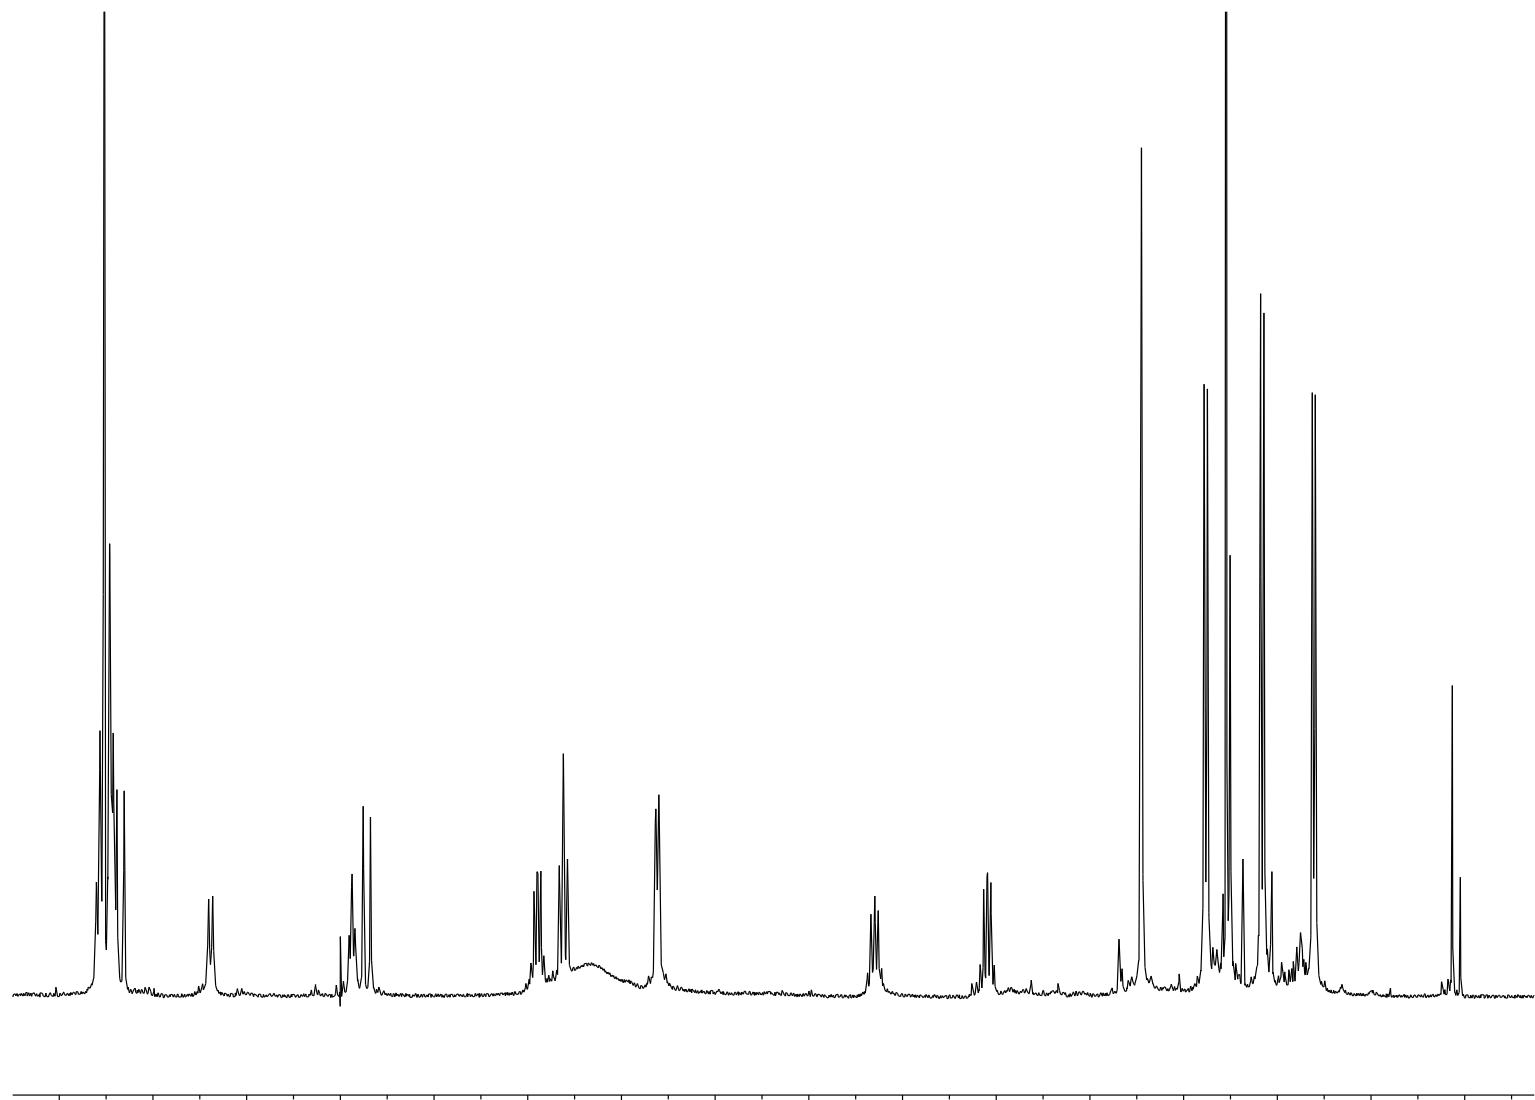

**Figure S7.**  $^{13}\text{C}$  NMR (100 MHz) Spectrum of Compound **2** in  $\text{CDCl}_3$

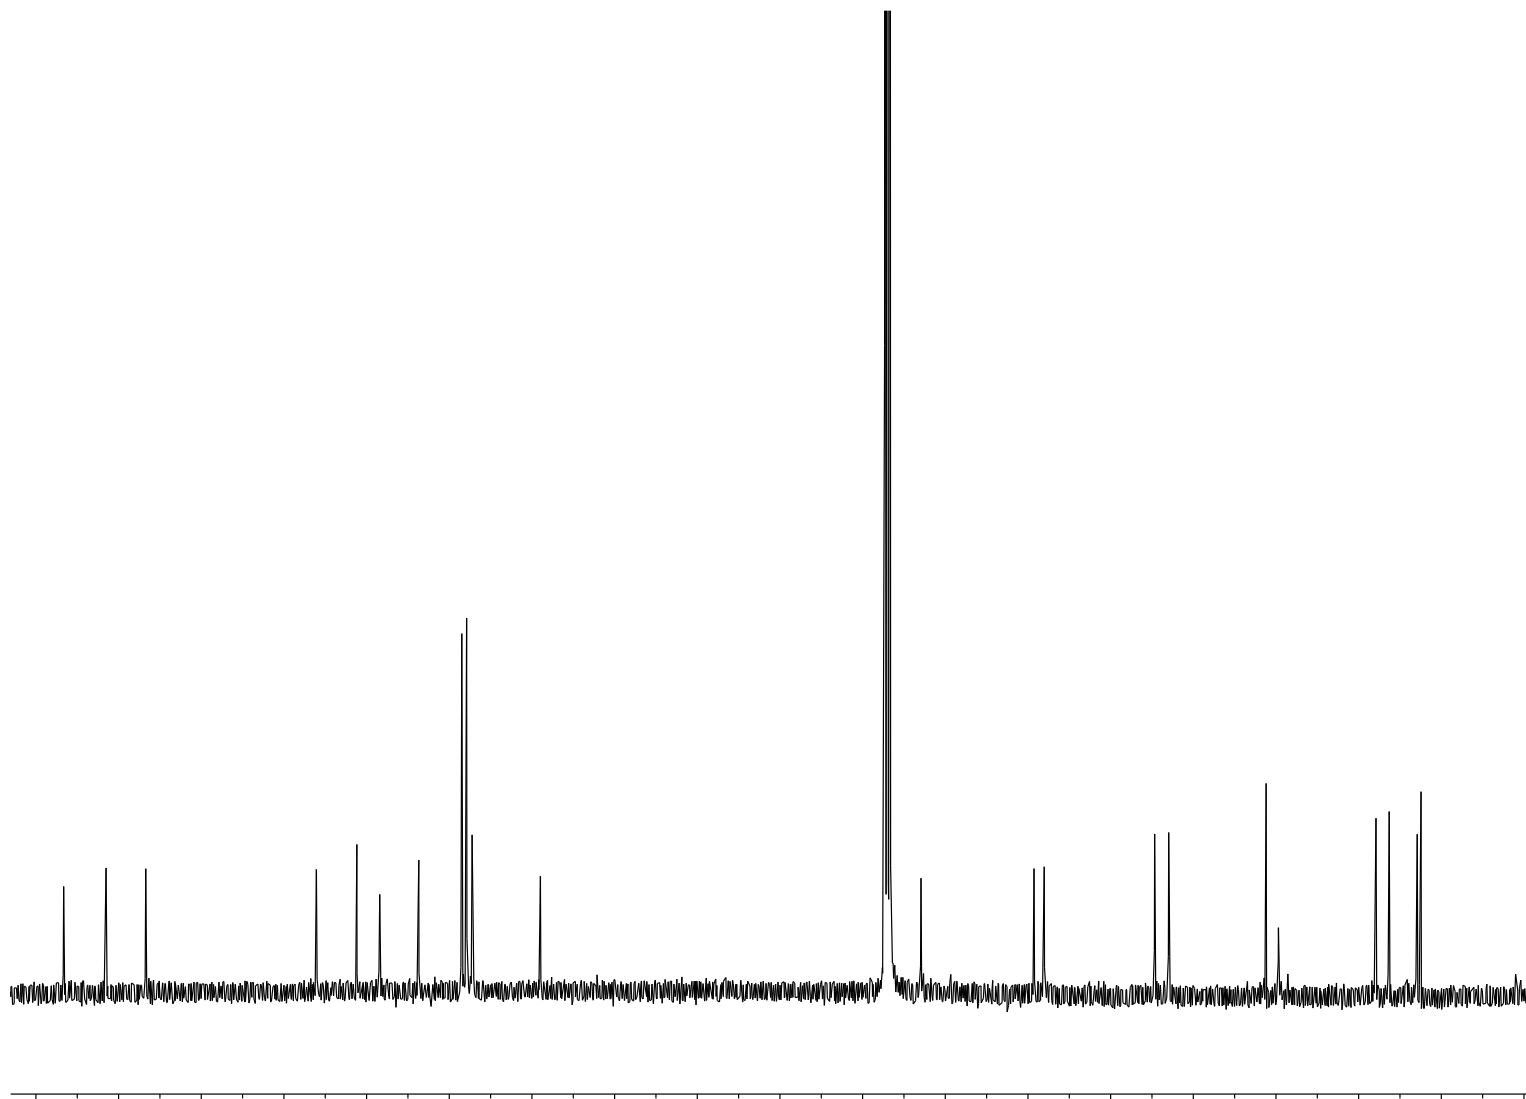

**Figure S8.** gCOSY (400 MHz) Spectrum of Compound **2** in CDCl<sub>3</sub>

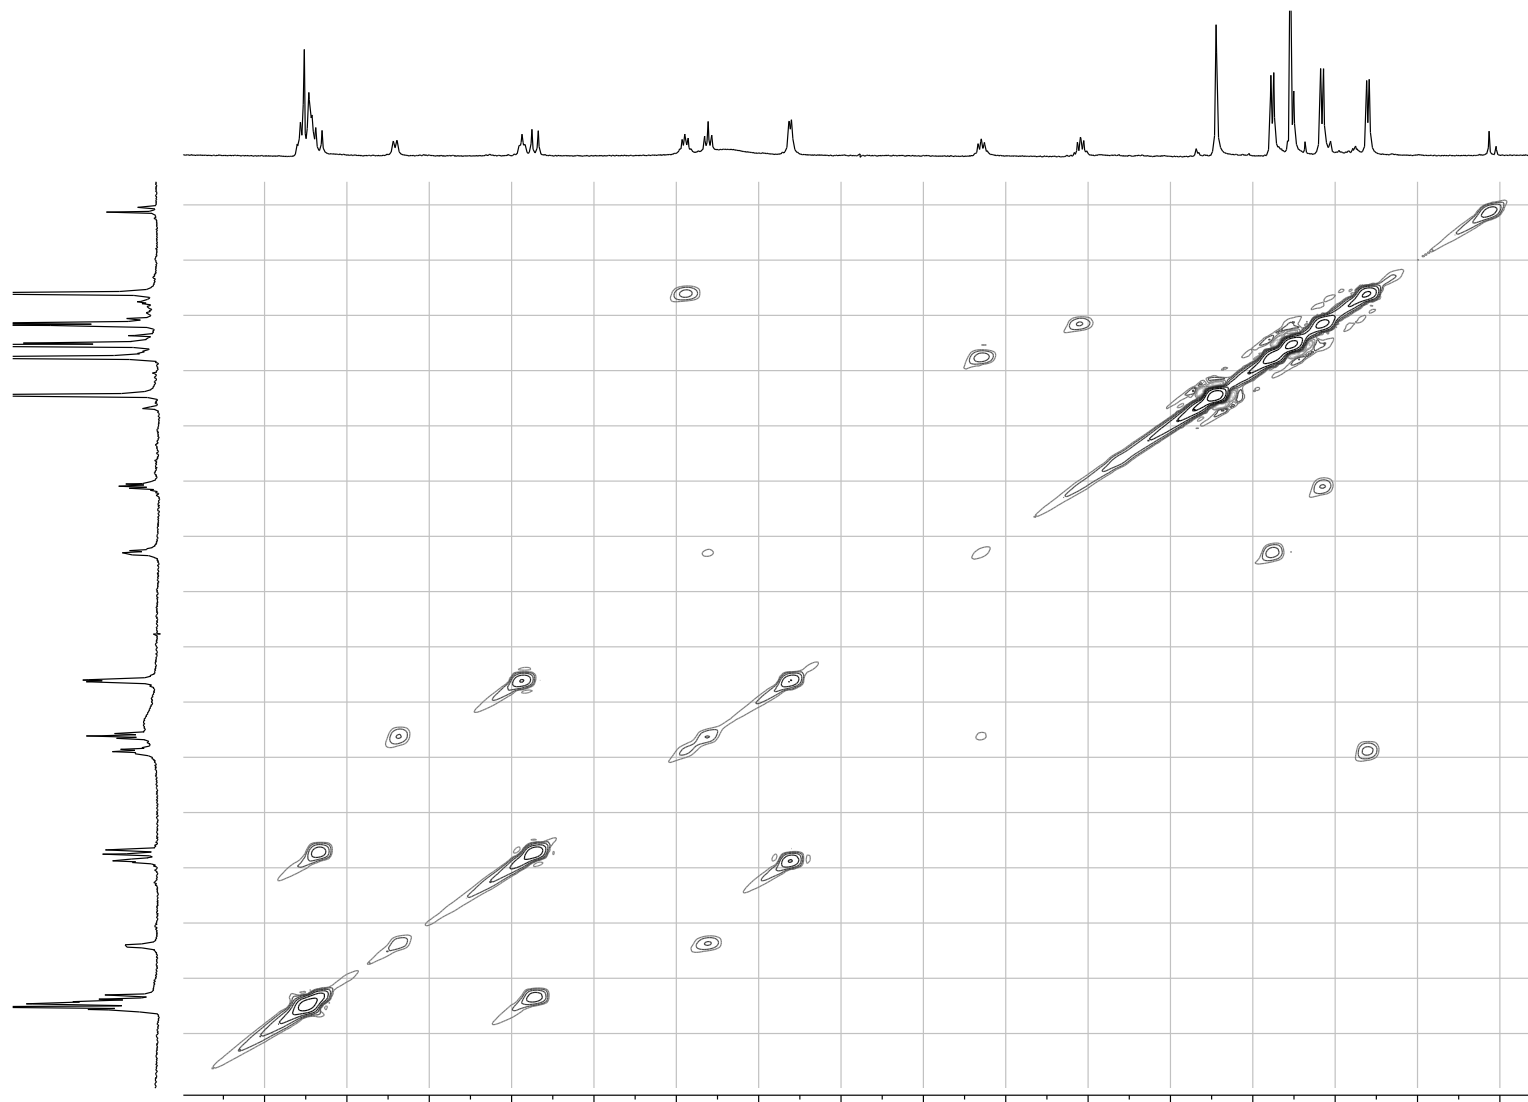

**Figure S9.** TOCSY (400 MHz) Spectrum of Compound **2** in CDCl<sub>3</sub>

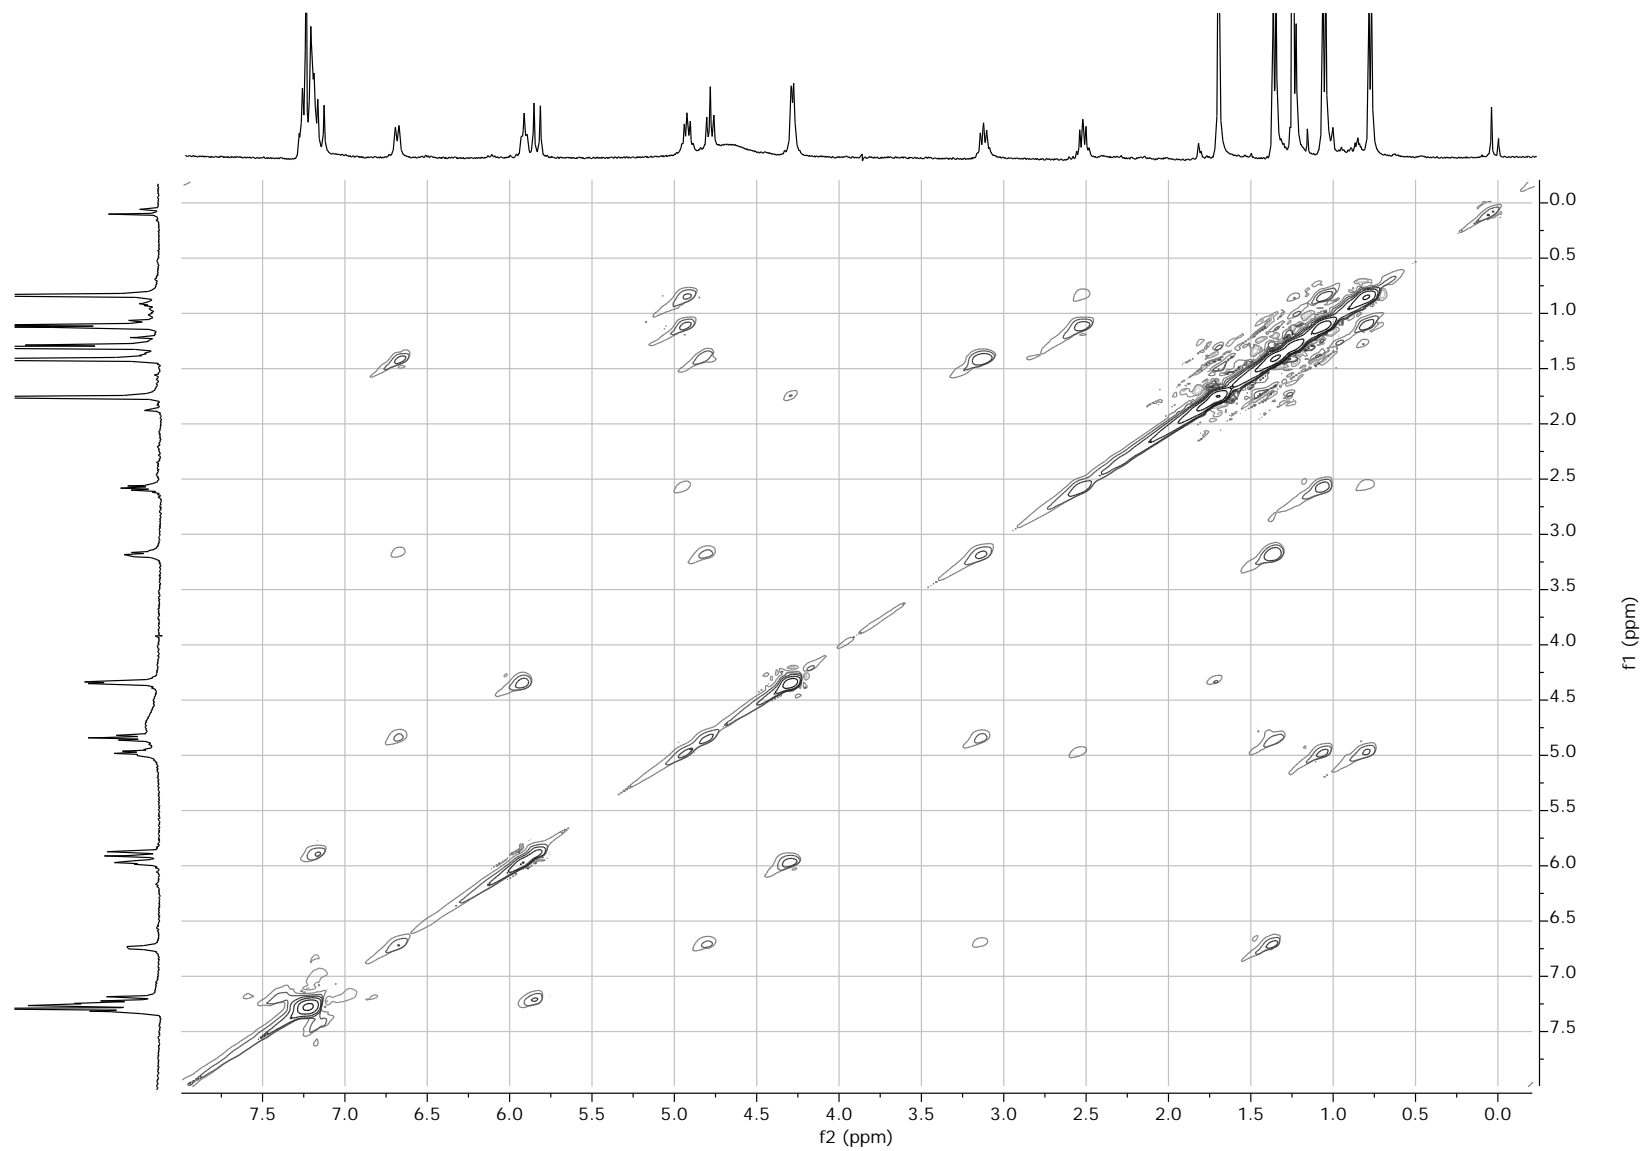

**Figure S10.** gHSQC (400 MHz) Spectrum of Compound **2** in CDCl<sub>3</sub>

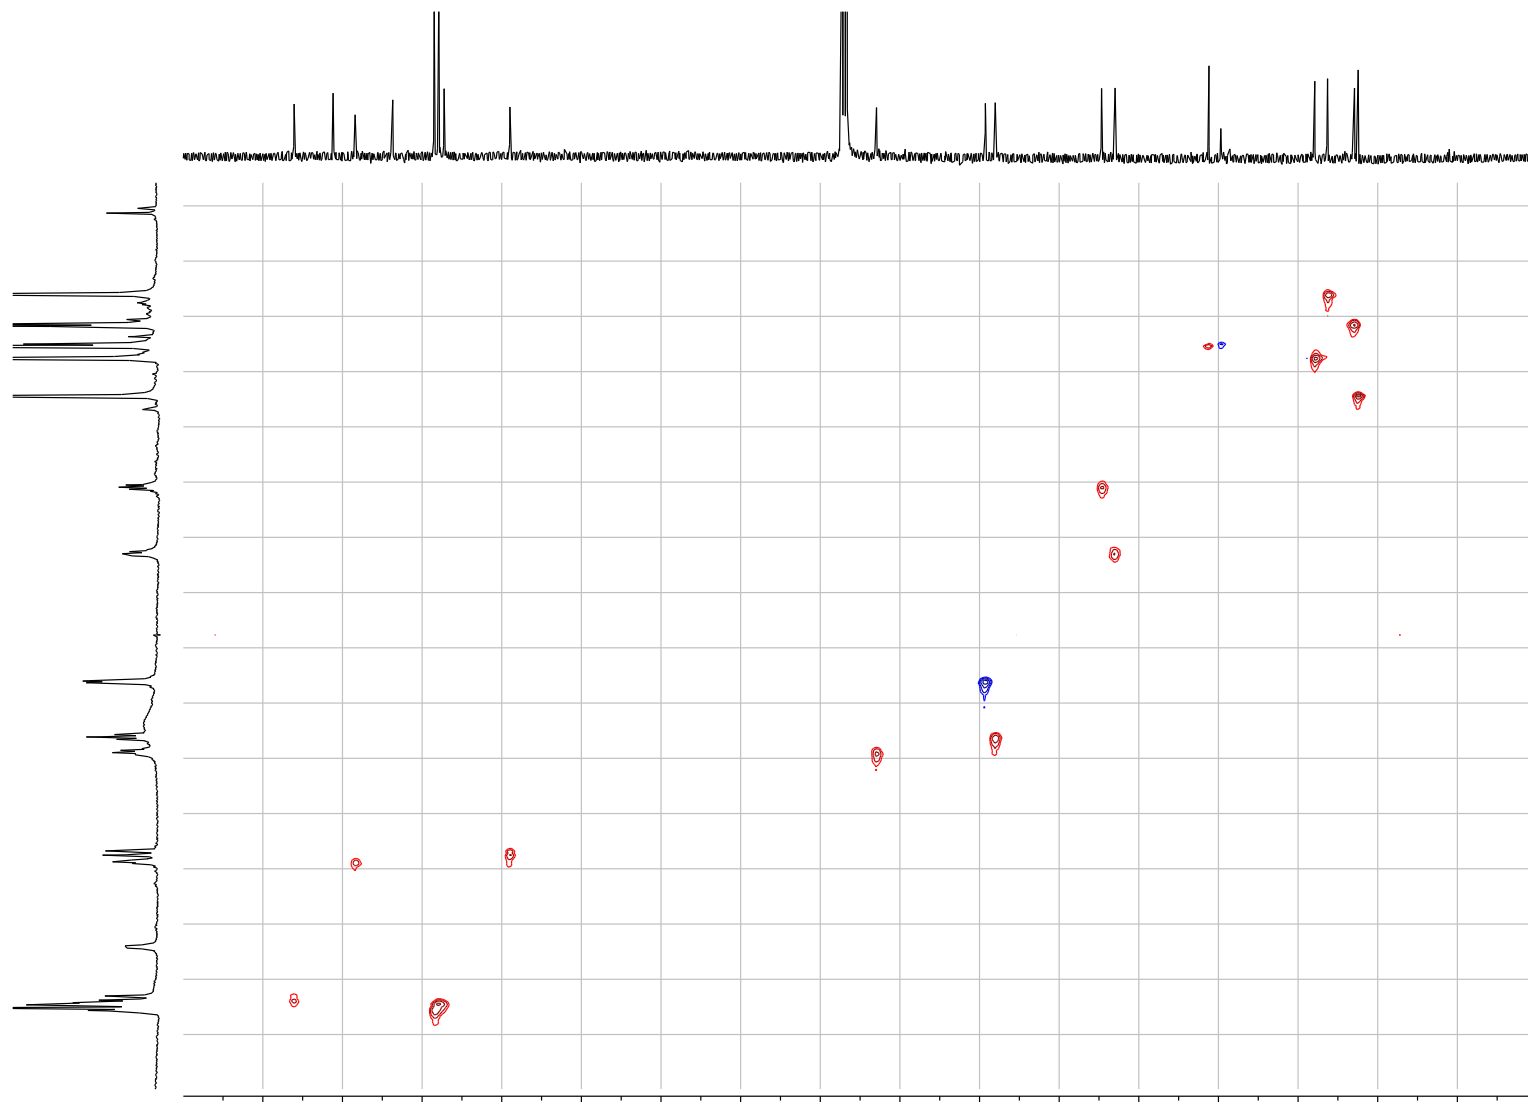

**Figure S11.** gHMBC (400 MHz) Spectrum of Compound **2** in CDCl<sub>3</sub>

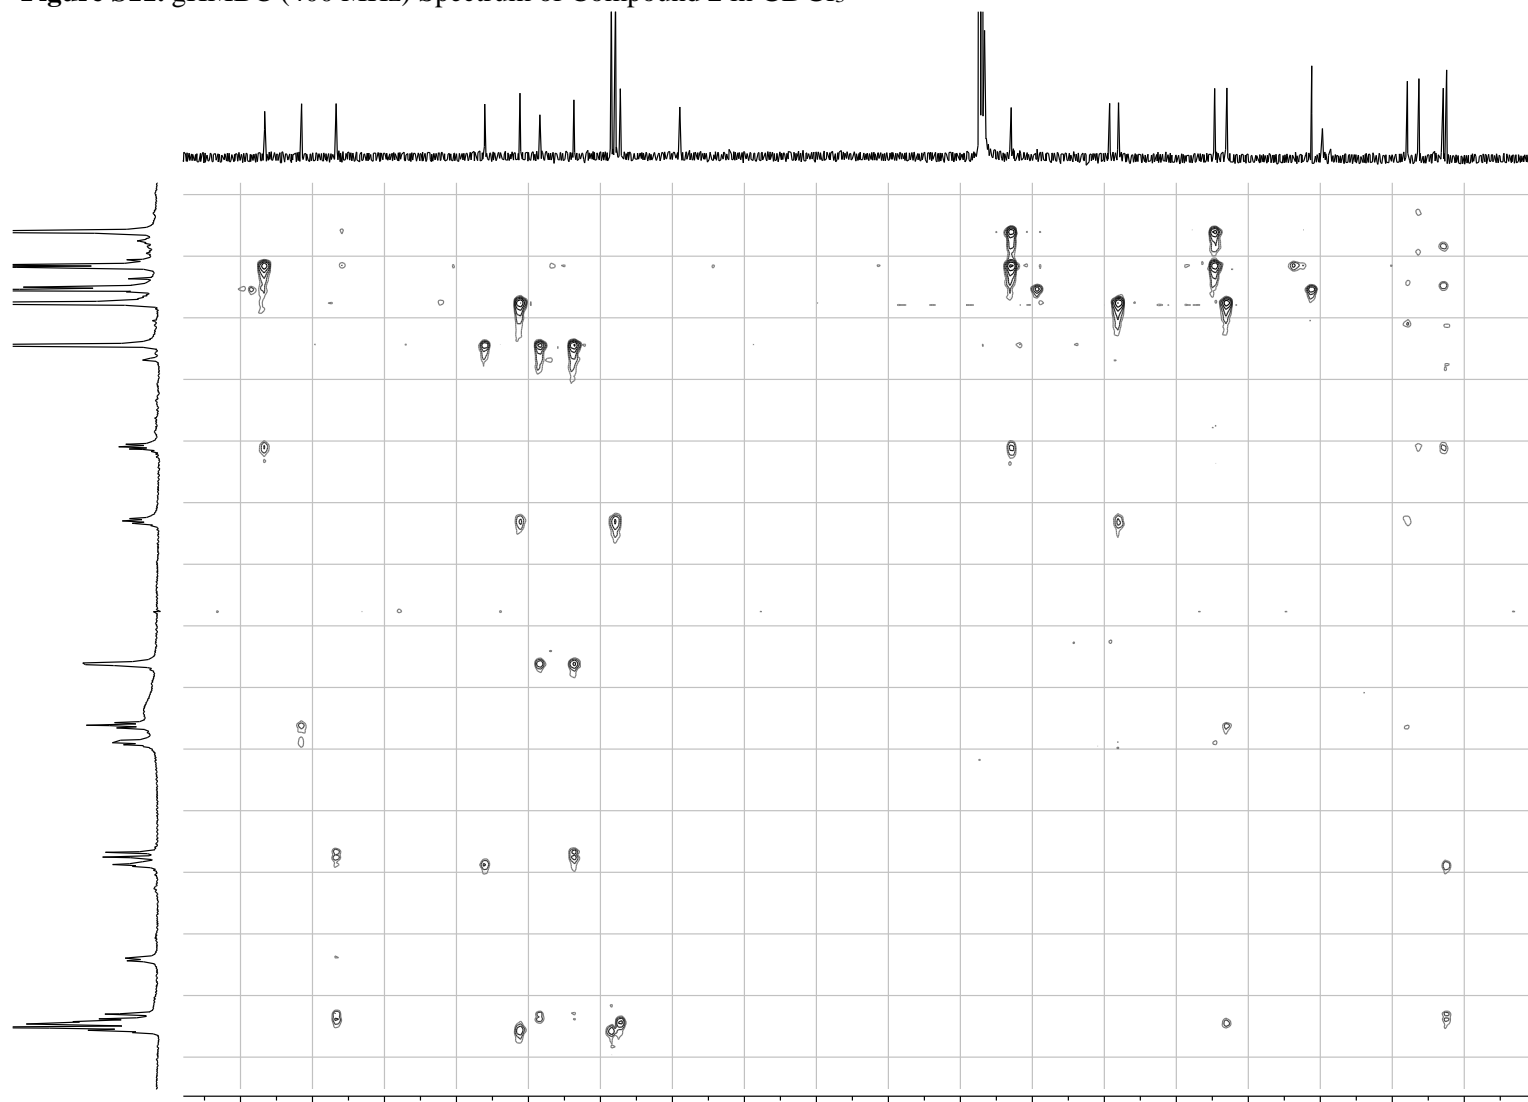

**Figure S12.**  $^1\text{H}$  NMR (500 MHz) Spectrum of Compound **3** in  $\text{CDCl}_3$

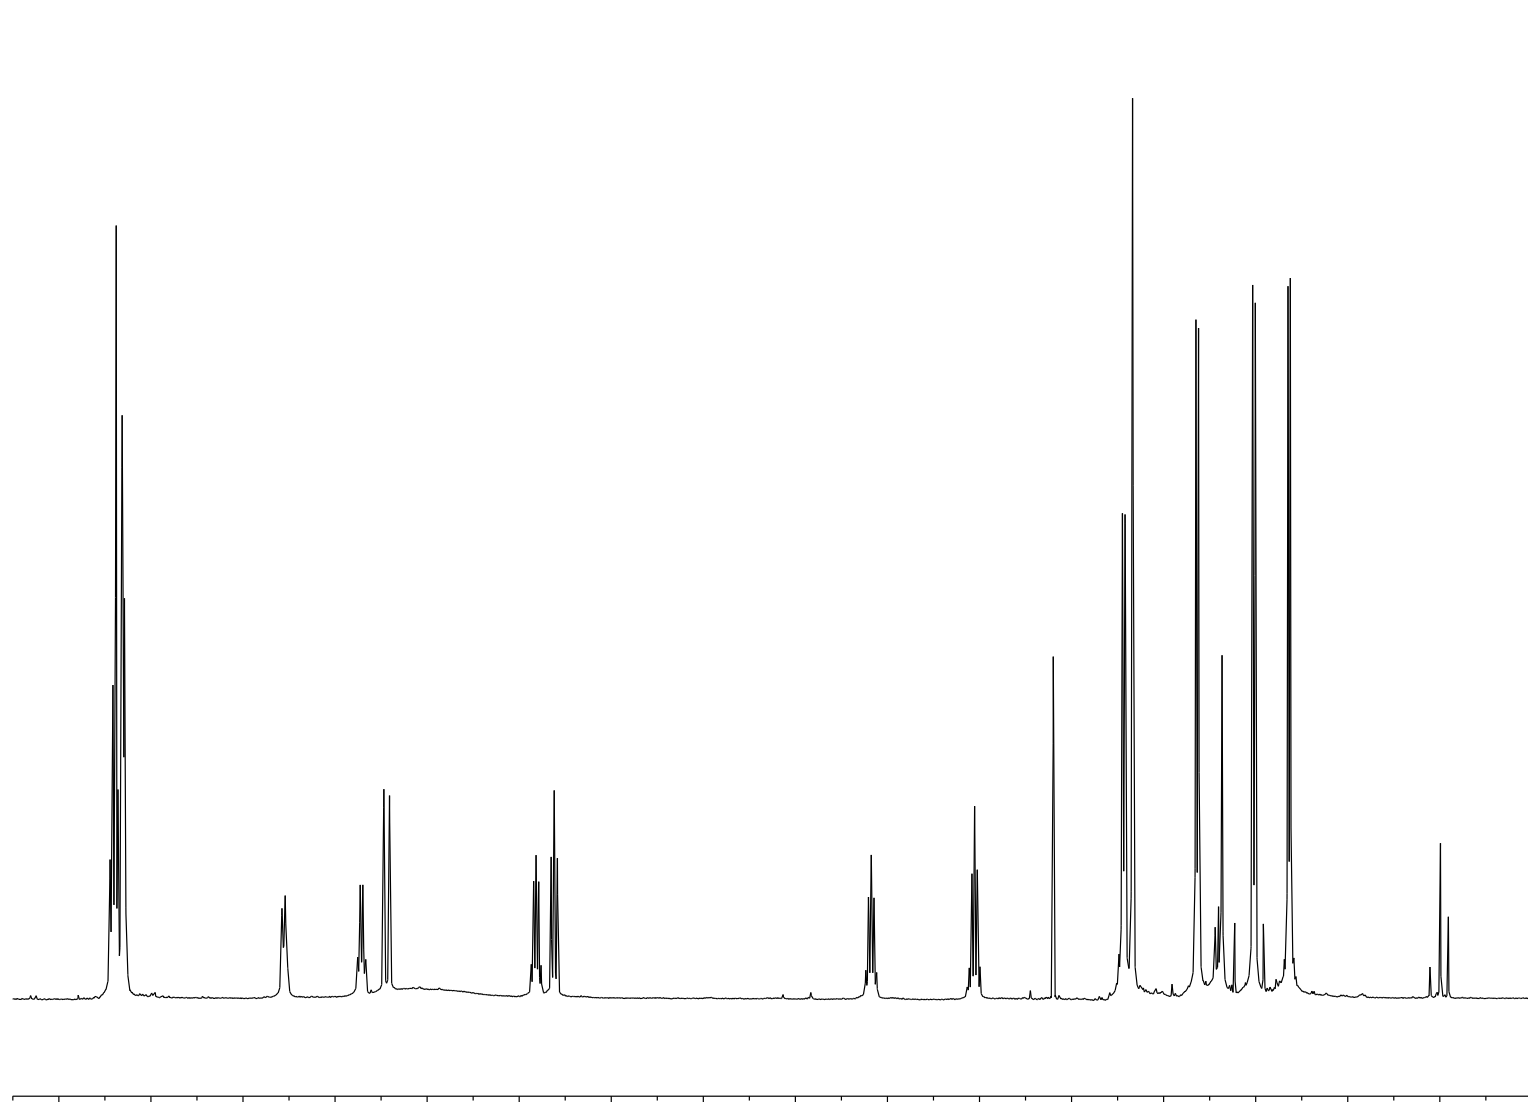

**Figure S13.**  $^{13}\text{C}$  NMR (100 MHz) Spectrum of Compound **3** in  $\text{CDCl}_3$

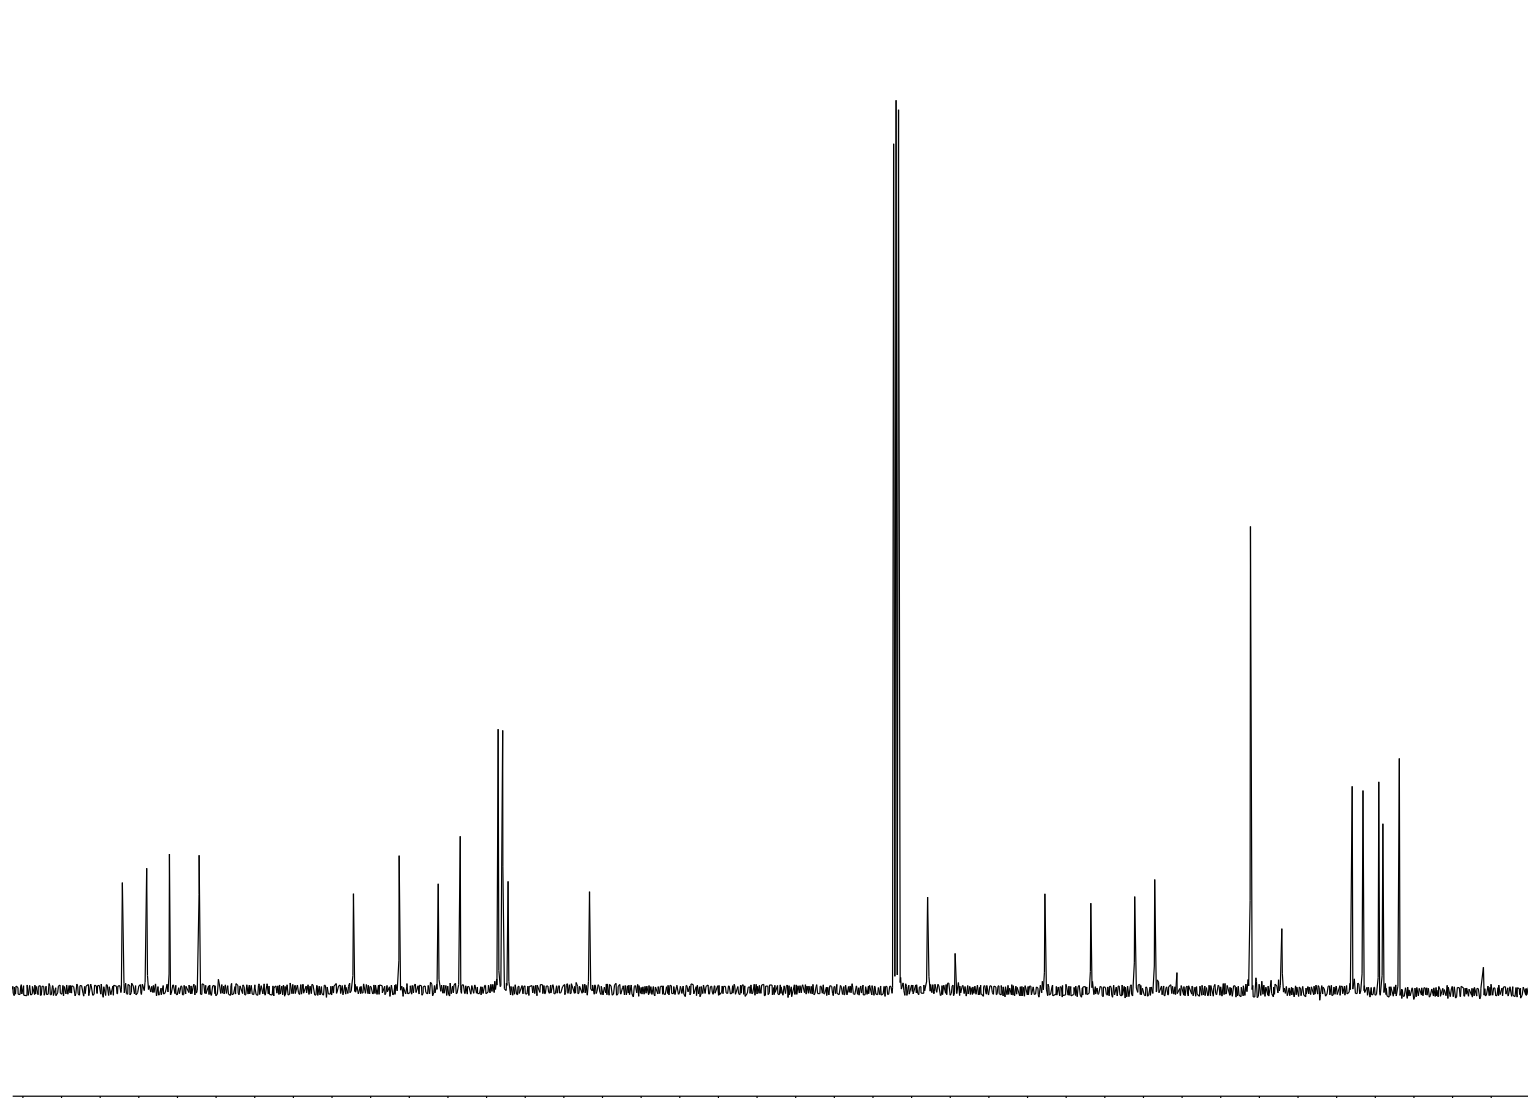

**Figure S14.**gCOSY (500 MHz) Spectrum of Compound **3** in CDCl<sub>3</sub>

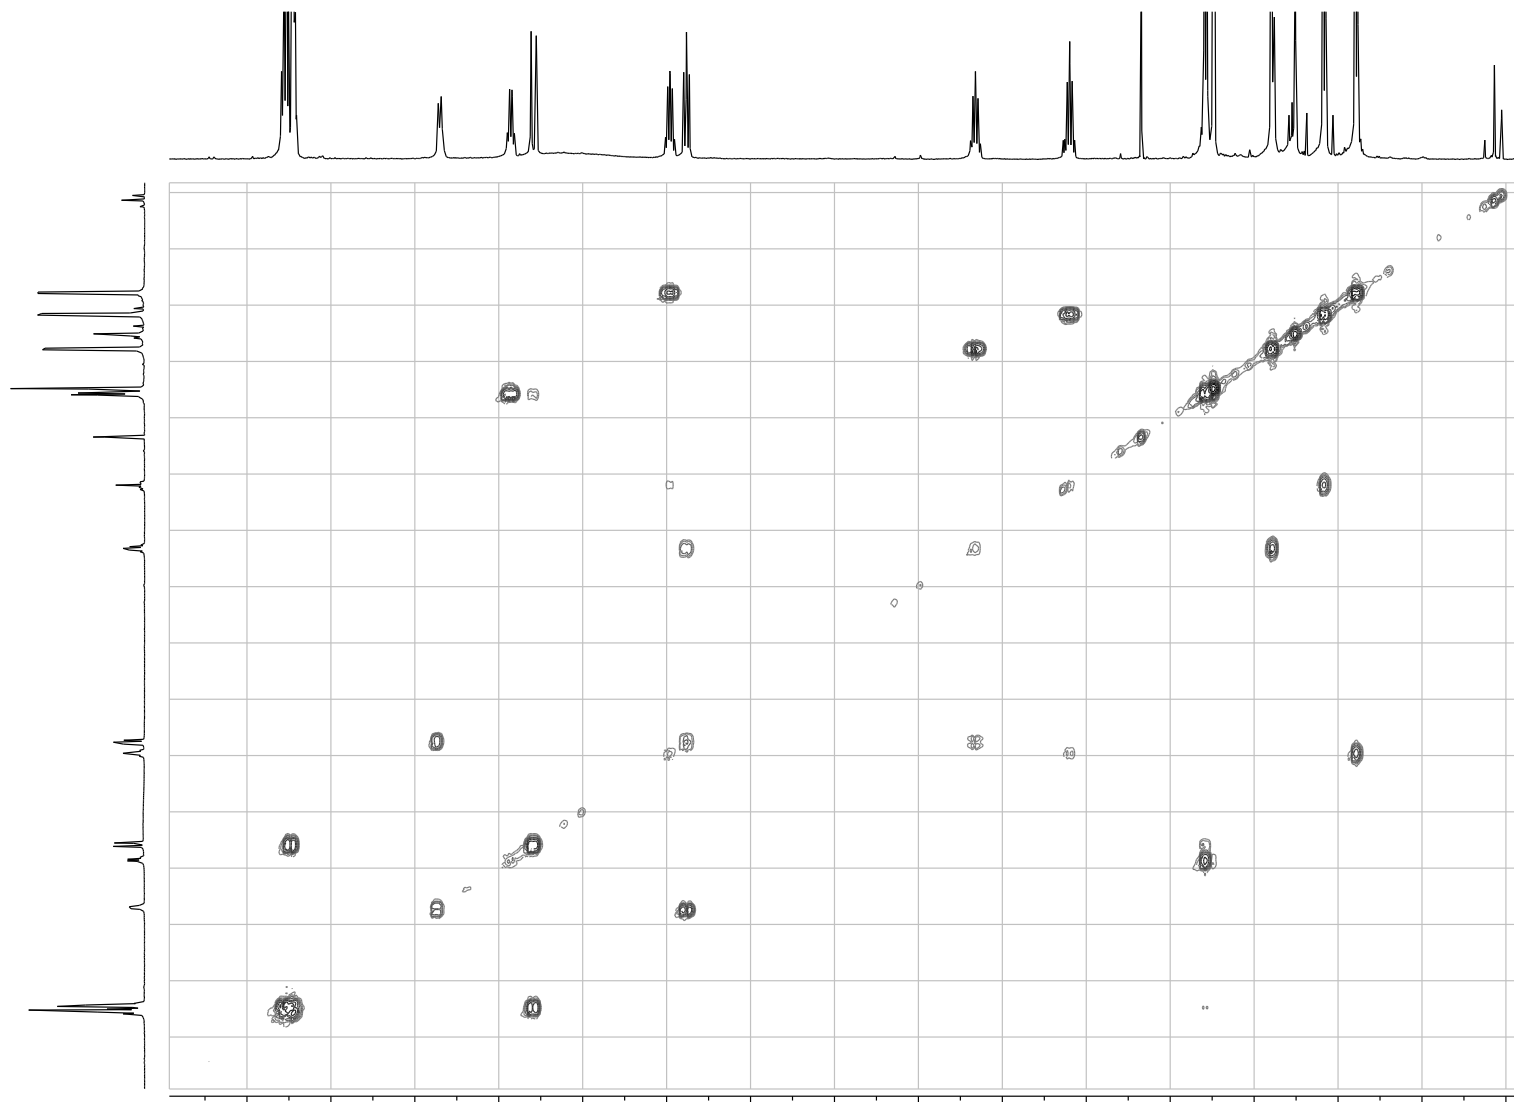

Figure S15. TOCSY (500 MHz) Spectrum of Compound 3 in CDCl<sub>3</sub>

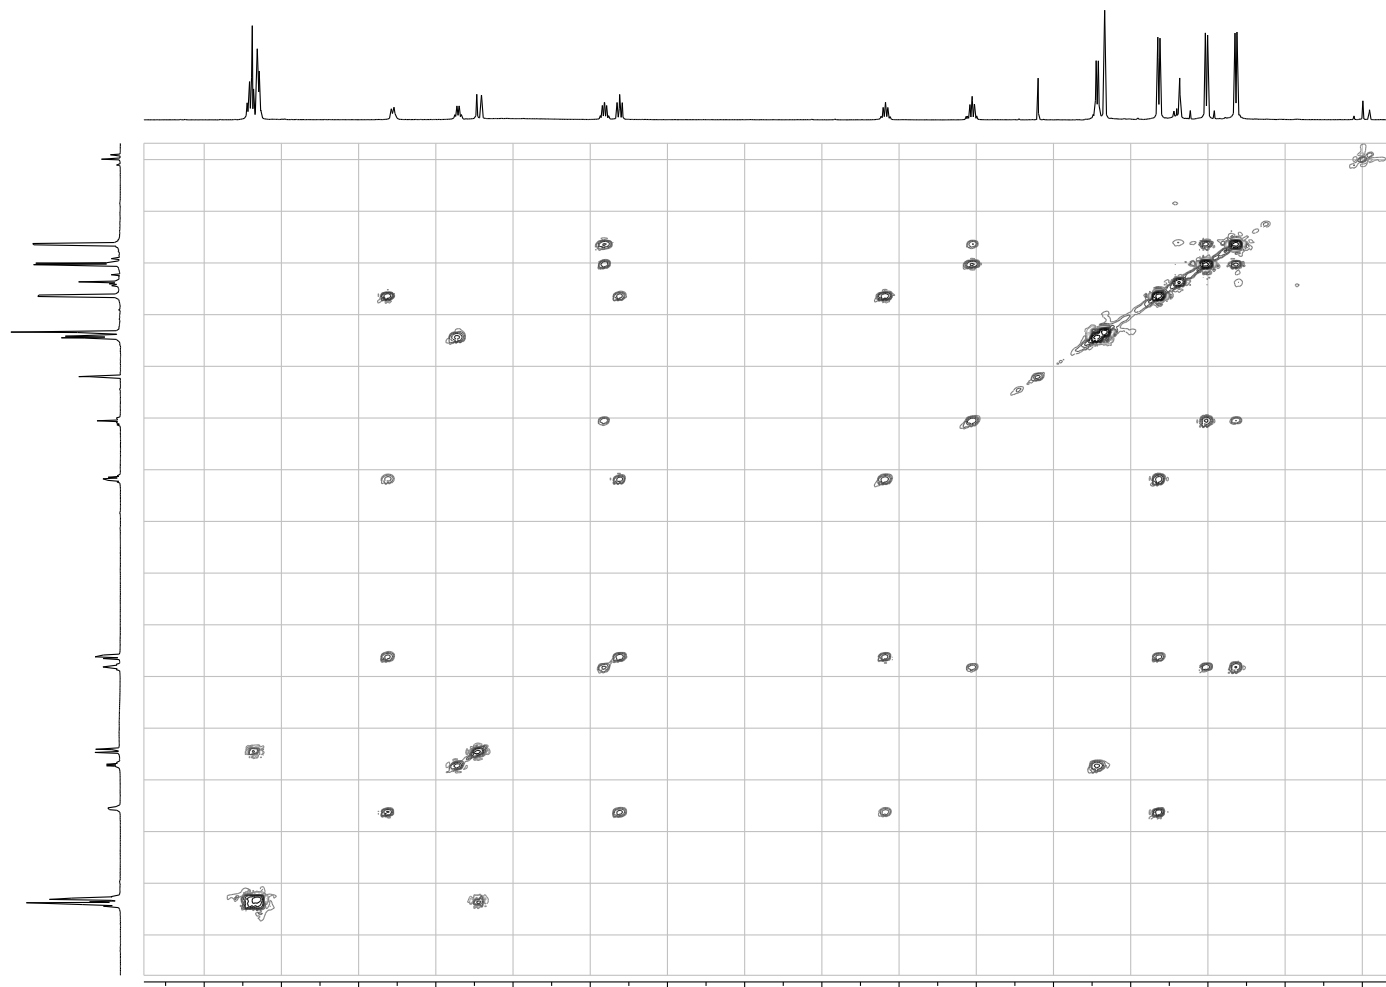

**Figure S16.**gHSQC (500 MHz) Spectrum of Compound **3** in CDCl<sub>3</sub>

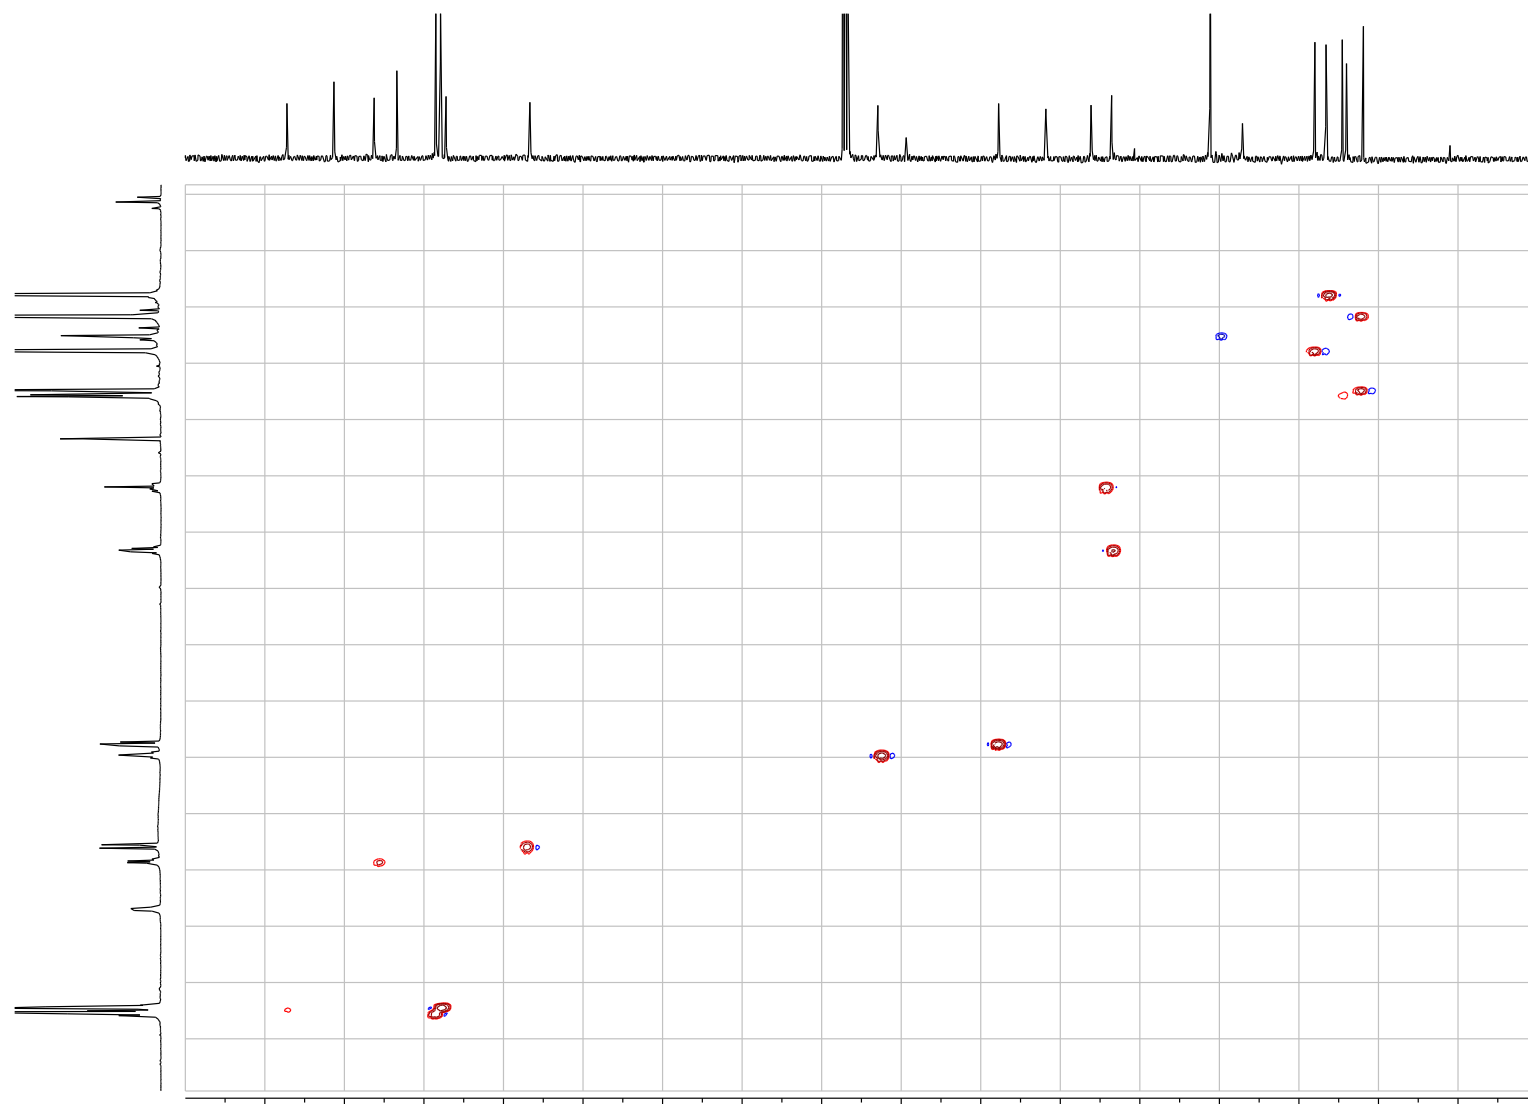

Figure S17.gHMBC (500 MHz) Spectrum of Compound 3 in CDCl<sub>3</sub>

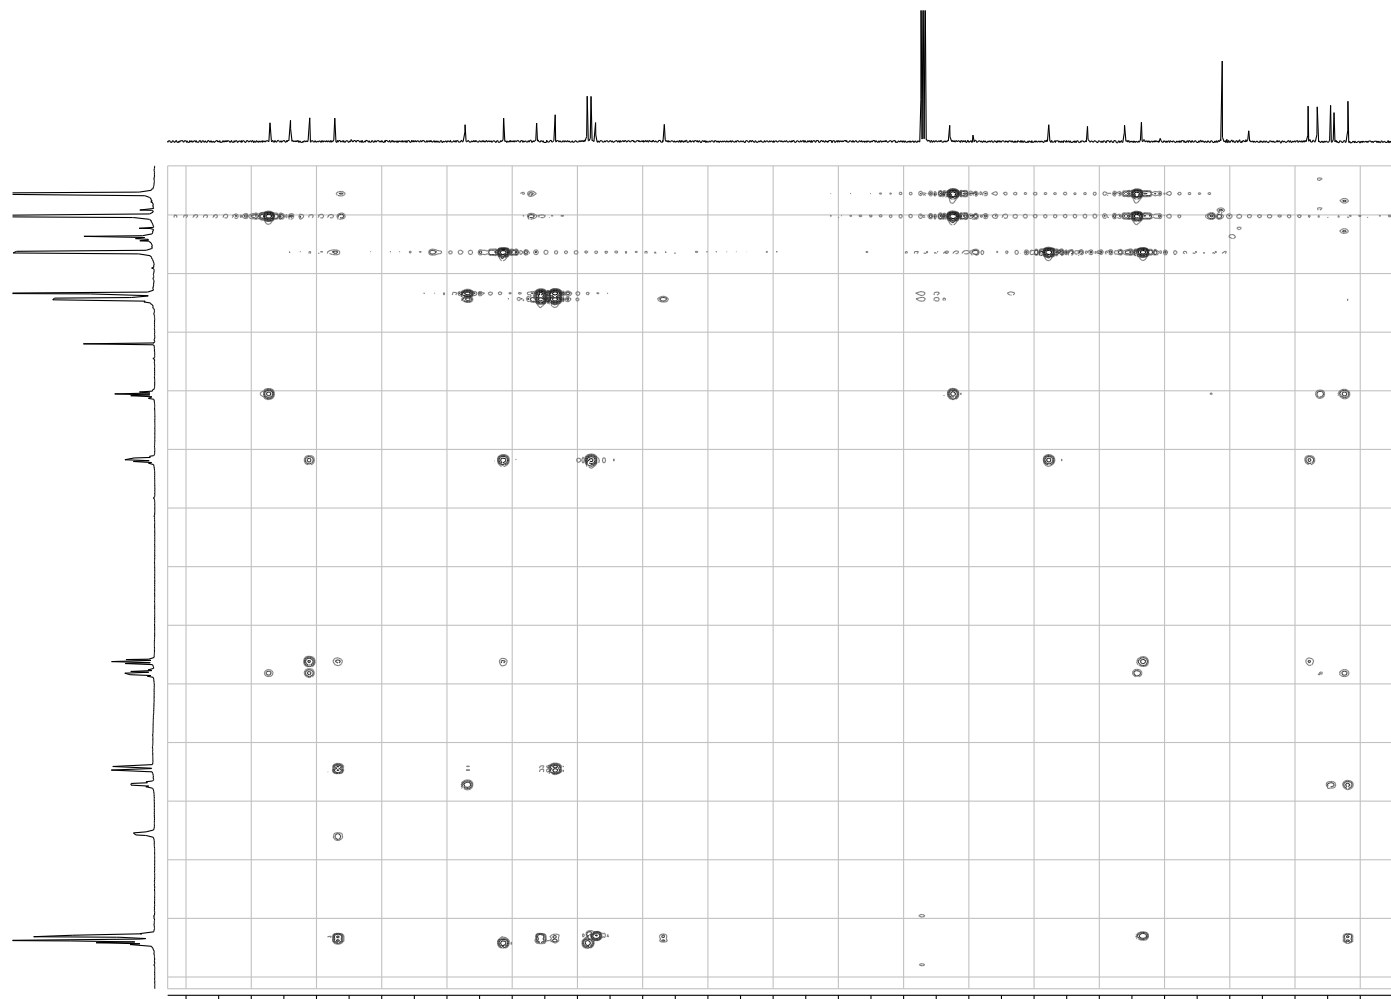

Figure S18.ROESY (500 MHz) Spectrum of Compound 3 in CDCl<sub>3</sub>

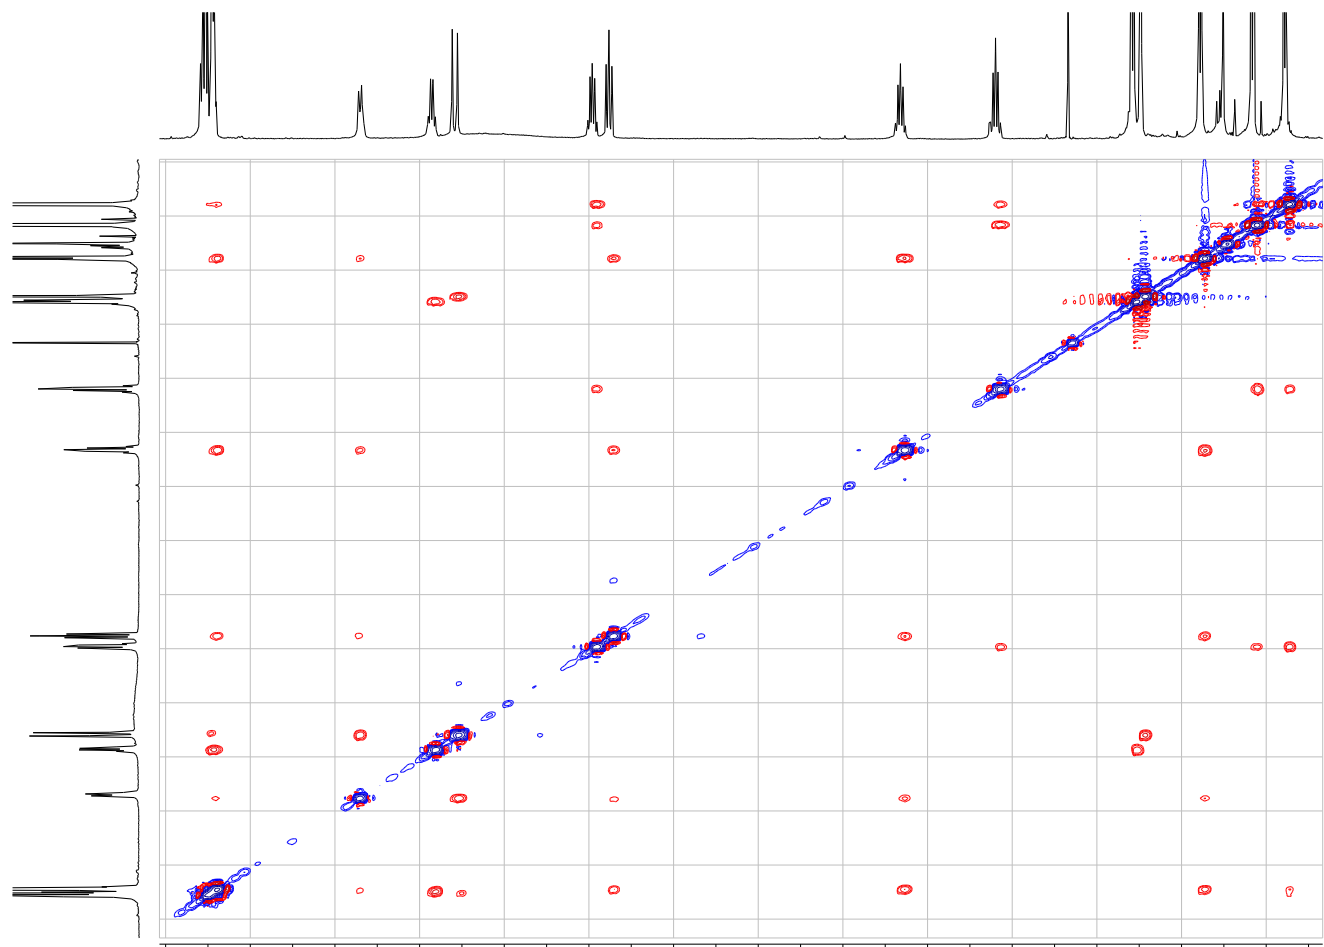

Figure S19. HRESIMS  $m/z$  516.2709 (calcd for  $C_{27}H_{38}N_3O_7$  516.2704) of 1.

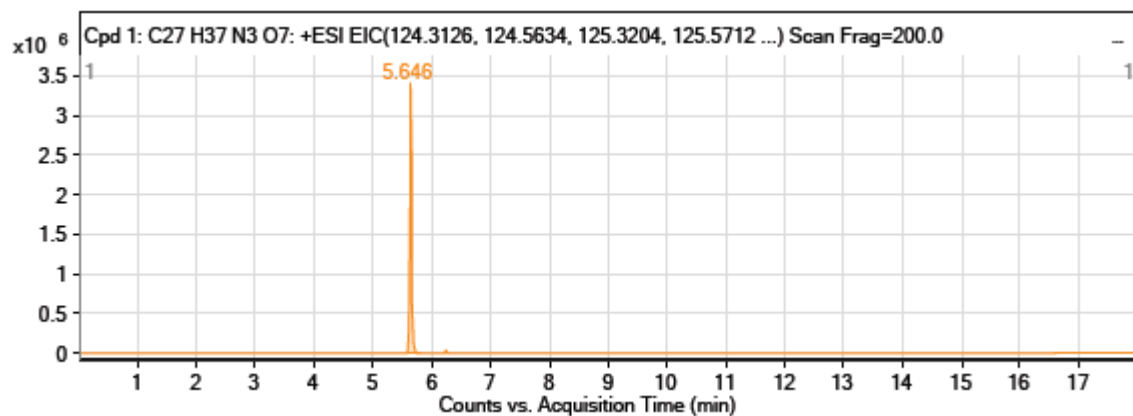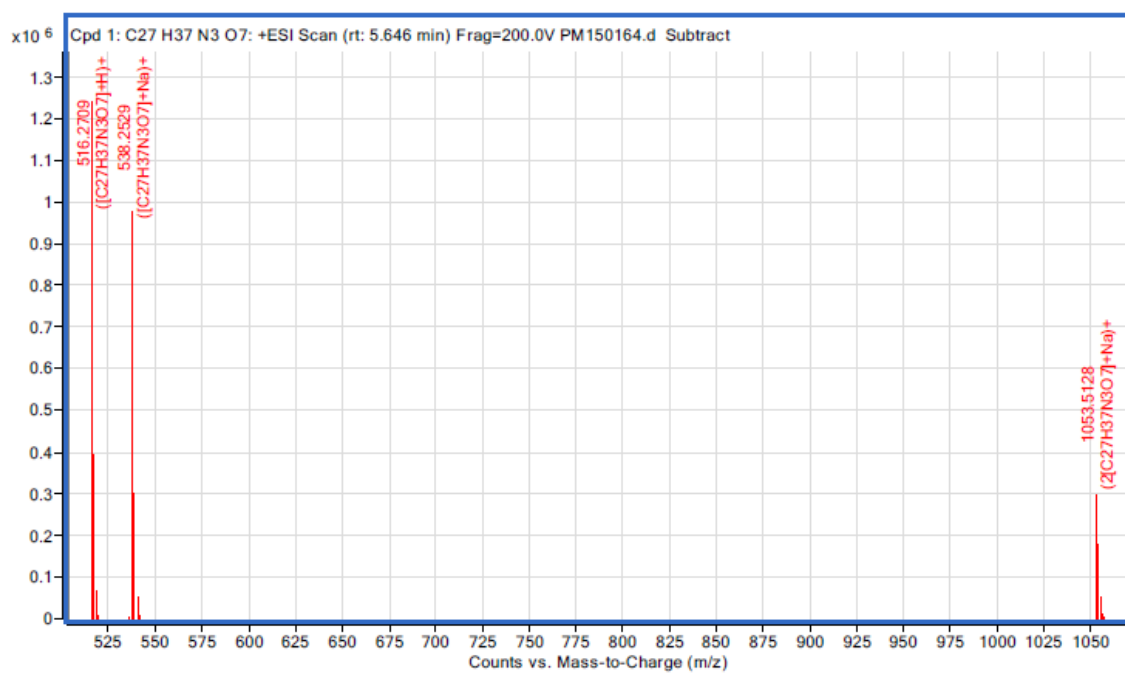

Figure S20. HRESIMS  $m/z$  404.2099 (calcd for  $C_{22}H_{30}NO_6$  404. 2079) of 2.

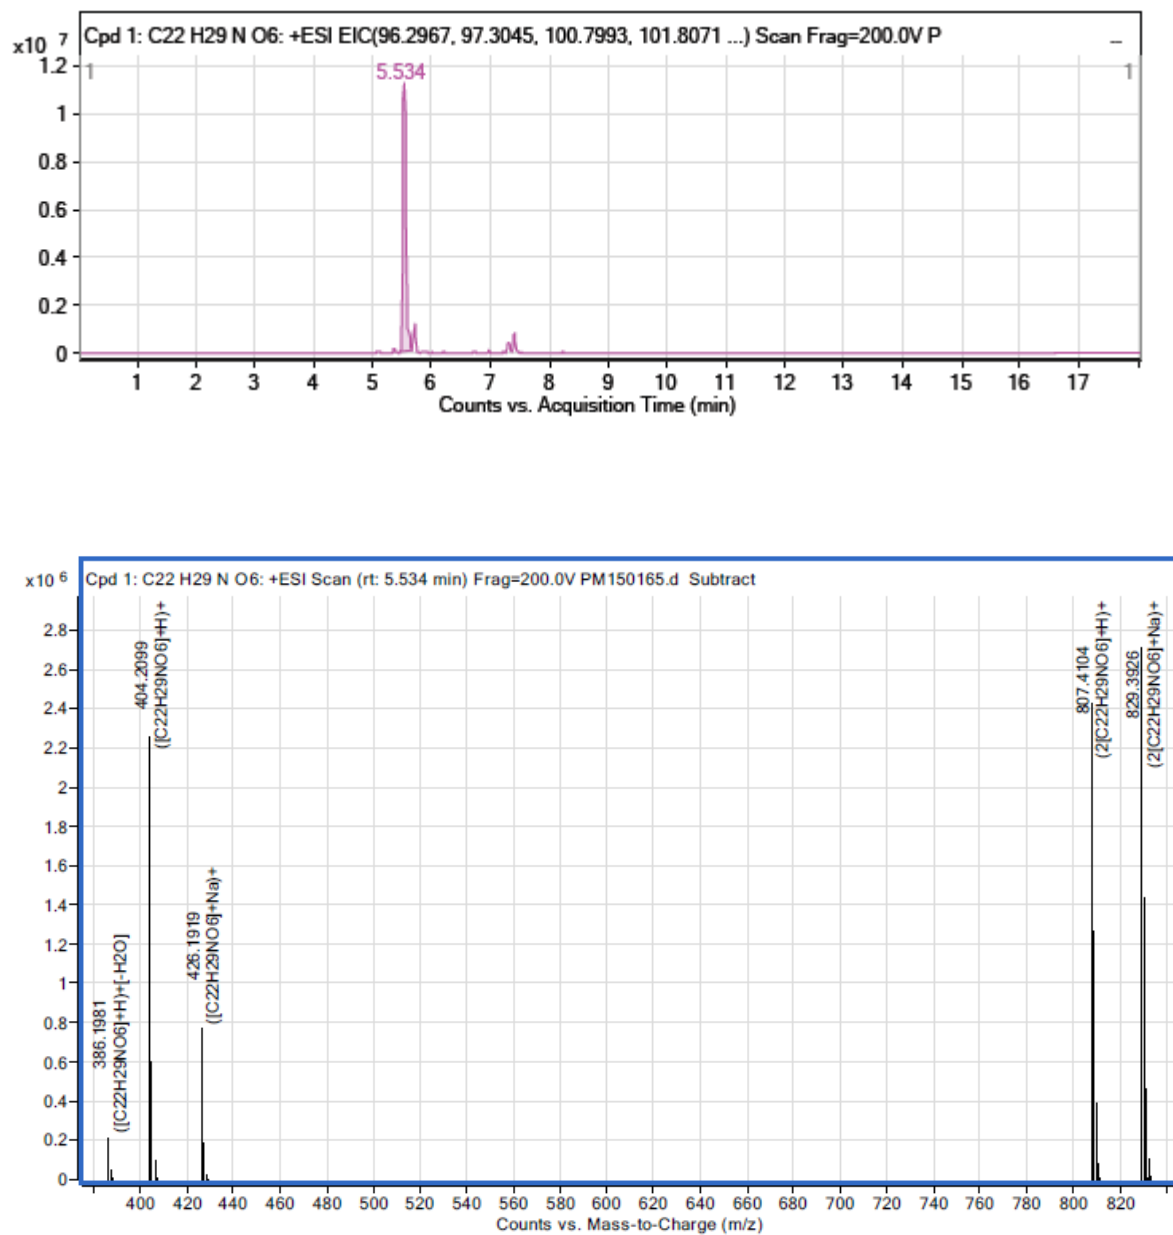

Figure S21. ESIMS  $m/z$  388.2141 (calcd for  $C_{22}H_{30}NO_5$  388.2118) of 3.

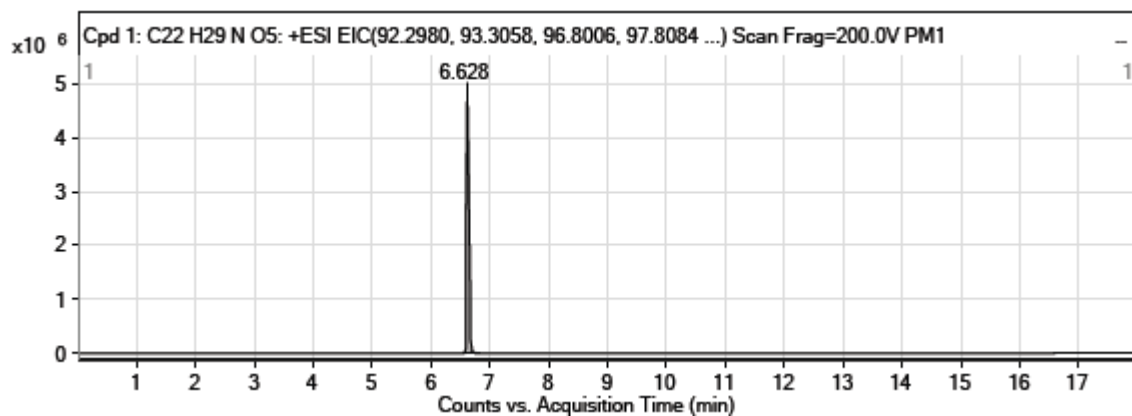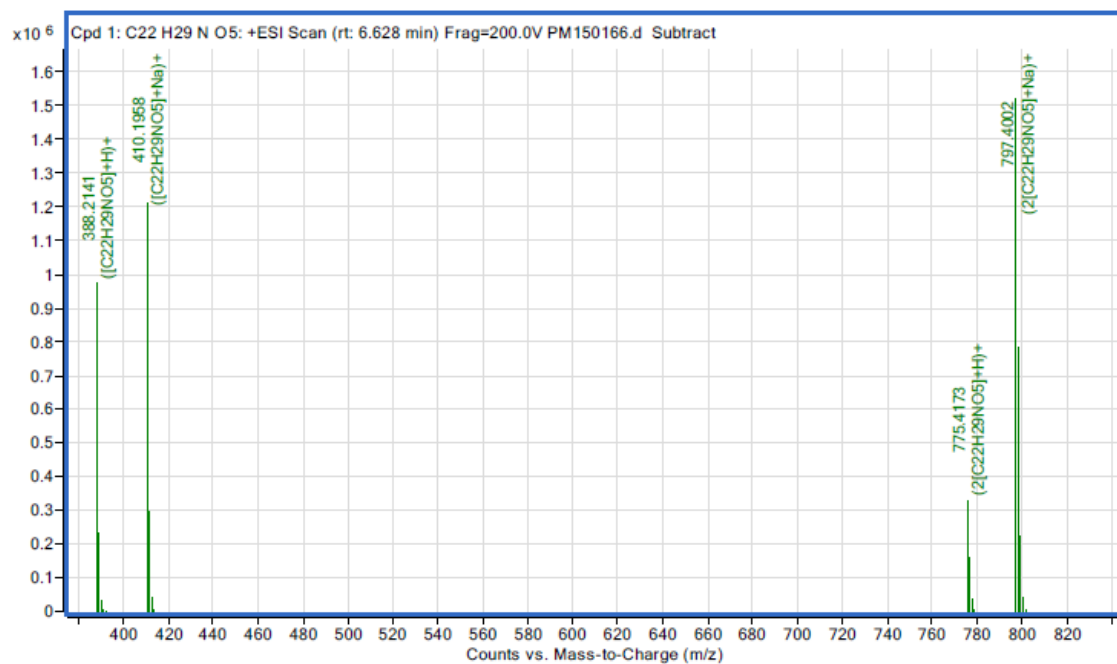

Supplement: Supplementary file 1 [file marinedrugs-16-00259-s001.zip › Supplementary file 1.pdf]
