# Supplementary material for: Characterization of the Jomthonic Acids Biosynthesis Pathway and Isolation of Novel Analogues in Streptomyces caniferus GUA-06-05-006A
Source: Mar Drugs. 2018 Jul 31;16(8):259. doi: 10.3390/md16080259 (PMC6117699; doi:10.3390/md16080259)

**Table S1.** Primers and plasmids used in this work

| Primer           | Sequence (5'-3')                 | PCR product and purpose                                                                          | Plasmid<br>(related strain)      |
|------------------|----------------------------------|--------------------------------------------------------------------------------------------------|----------------------------------|
| ermE*p insertion |                                  |                                                                                                  |                                  |
| EcoRI-EP1        | TATAGAATTCGCTGACTTCGAGGAAGTGGT   | 2769-bp fragment for ermE*p insertion upstream (-104 bp from start codon) of jomP1 in chromosome | pEjomP1<br>(G-pErm*)             |
| PstI-EP1         | TATACTGCAGCCCGCAATTCAGGTTCTTTA   |                                                                                                  |                                  |
| Gene mutation    |                                  |                                                                                                  |                                  |
| EcoRI-P1         | TATAGAATTCGAGAGTTCTGCTTCGGGATG   | 2938-bp fragment for jomP1 interruption                                                          | pIjomP1<br>(jomP1 <sup>-</sup> ) |
| HindIII-P1       | TATAAAGCTTGCGTCGCAGTACTTCGGTAT   |                                                                                                  |                                  |
| EcoRI-N          | TATAGAATTCGCTGGTCGGTGTCTCTC      | 2246-bp fragment for jomN interruption                                                           | pIjomN<br>(jomN <sup>-</sup> )   |
| HindIII-N        | TATAAAGCTTGTCTCTCTACGACGCCTTG    |                                                                                                  |                                  |
| NsiI-orf8        | TATAATGCATCTTCCGCATCAGAGGACAGT   | 2590-bp upstream flanking region for orf8deletion                                                | pDorf8<br>(Δorf8-araC)           |
| SpeI-orf98       | TATAACTAGT GATGTTCCATTCGCCTGTCT  |                                                                                                  |                                  |
| EcoRV- orf8      | TATAGATATCGGTCGGTACAACGTCGTCTT   | 2433-bp downstream flanking region for orf8 deletion                                             |                                  |
| BamHI- orf8      | TATAGGATCCCTTCATCGACGCCTTCAACT   |                                                                                                  |                                  |
| NsiI-orf9        | TATAATGCATTGACGACAGTTGCCTTCTTG   | 2501-bp upstream flanking region for orf9 deletion                                               | pDorf9<br>(Δorf9)                |
| SpeI-orf9        | TATAACTAGTCAGTTCCACCAACTCCACCT   |                                                                                                  |                                  |
| EcoRV-orf9       | TATAGATATCACATGTGTCGATCCCGAAGAGT | 2495-bp downstream flanking region for orf9 deletion                                             |                                  |
| BglII-orf9       | TATAAGATCTCCTCCTACGAAGGGGAGTTC   |                                                                                                  |                                  |
| SpeI-orf16       | TATAACTAGTCCCTTCTTGAAAGGACCACA   | 2659-bp upstream flanking region for orf16 deletion                                              | pDorf16<br>(Δorf16-luxR)         |
| NsiI-orf16       | TATAATGCATGAGTCATGATCACGCTCCAG   |                                                                                                  |                                  |
| BamHI-orf16      | TATAGGATCCGTCCTCGCGAAGCTACAGTT   | 2592-bp downstream flanking region for orf16 deletion                                            |                                  |
| EcoRV-orf16      | TATAGATATCATCTCCGTGAGAGTGGCATC   |                                                                                                  |                                  |
| SpeI-orf20       | TATAACTAGTTCGCGTACAACATCATCGAG   | 2510-bp upstream flanking region for orf20 deletion                                              | pDorf20<br>(Δorf20-marR)         |
| NsiI-orf20       | TATAATGCAT GTGCTGGGTGACGTCCTT    |                                                                                                  |                                  |
| BamHI-orf20      | TATAGGATCCCGTCTACGCCGTGCGAACAG   | 2353-bp downstream flanking region for orf20 deletion                                            |                                  |
| EcoRV-orf20      | TATAGATATCAAGTGGTTGCCGATGAAGAG   |                                                                                                  |                                  |

**Table S1.** Primers and plasmids used in this work (continued)

| Primer          | Sequence (5'-3')                         | PCR product and purpose                                                                           | Plasmid<br>(related strain) |
|-----------------|------------------------------------------|---------------------------------------------------------------------------------------------------|-----------------------------|
| Gene mutation   |                                          |                                                                                                   |                             |
| SpeI-orf29      | TATA <u>ACTAGT</u> CCTGGAGATATCCCTCACCA  | 2392-bp upstream flanking region for <i>orf29</i> deletion                                        | pDorf29<br>(Δorf29-gntR)    |
| NsiI-orf29      | TATA <u>ATGCAT</u> GCTGGGACAGCTGGAAATAC  |                                                                                                   |                             |
| BglII-orf29     | TATA <u>AGATCT</u> GTTACGCCTTCGAGTTCCAG  | 2609-bp downstream flanking region for <i>orf29</i> deletion                                      |                             |
| EcoRV-orf29     | TATA <u>GATATC</u> CCTGCGATCGAGAAGAAAAGG |                                                                                                   |                             |
| SpeI-orf31      | TATA <u>ACTAGT</u> GTCTCCAGCGTGAGACCACT  | 2345-bp upstream flanking region for <i>orf31</i> deletion                                        | pDorf31<br>(Δorf31)         |
| NsiI-orf31      | TATA <u>ATGCAT</u> GTGAAGGGGCGGTAGTCG    |                                                                                                   |                             |
| BglII-orf31     | TATA <u>AGATCT</u> ACGACGAGTTCAAGGCGTAT  | 2316-bp downstream flanking region for <i>orf31</i> deletion                                      |                             |
| EcoRV-orf31     | TATA <u>GATATC</u> ATGACGCAGAGCACCTTCTT  |                                                                                                   |                             |
| SpeI-M          | TATA <u>ACTAGT</u> CCTCGCGTACGTCATCTACA  | 2506-bp upstream flanking region for <i>jomM</i> deletion                                         | pDjomM<br>(ΔjomM)           |
| NsiI-M          | TATA <u>ATGCAT</u> CGTGGTTGTACACCTCGGATA |                                                                                                   |                             |
| BglII-M         | TATA <u>AGATCT</u> GACTACCTCCCCACACTGGA  | 2751-bp downstream flanking region for <i>jomM</i> deletion                                       |                             |
| EcoRV-M         | TATA <u>GATATC</u> CGGGAGCTGAACTGTAGCTT  |                                                                                                   |                             |
| Gene expression |                                          |                                                                                                   |                             |
| EcoRV-araC      | TATA <u>GATATC</u> GTGGTGGCGAGCCCTAAG    | 917-bp fragment containing <i>orf8</i> (-31 bp from start codon) for gene overexpression          | pSAraC<br>(G- pSAraC)       |
| BamHI-araC      | TATA <u>GGATCC</u> CTCTGTGGGTCTTCCGTCC   |                                                                                                   |                             |
| EcoRV-luxR      | TATA <u>GATATC</u> CCTACCGCGCCGGCCGCT    | 2376-bp fragment containing <i>orf16</i> (-100 bp from start codon) for gene overexpression       | pSLuxR<br>(G- pSLuxR)       |
| XbaI-luxR       | TATA <u>TCTAGA</u> GTGTCCCTTCCGGAGCAAAG  |                                                                                                   |                             |
| EcoRV-marR      | TATA <u>GATATC</u> GTCAATTCCTCCAGGGCCG   | 547-bp fragment containing <i>orf20</i> (-84 bp from start codon) for gene overexpression         | pSMarR<br>(G- pSMarR)       |
| BamHI-marR      | TATA <u>GGATCC</u> TGGGGTCTTCCTCACTCCTT  |                                                                                                   |                             |
| EcoRV-gntR      | TATA <u>GATATC</u> CAGGCGGACGGAATGACC    | 888-bp fragment containing <i>orf29</i> (-60 bp from start codon) for gene over-expression        | pSGntR<br>(G- pSGntR)       |
| BamHI-gntR      | TATA <u>GGATCC</u> TGTCCGGACAATGTGACCTC  |                                                                                                   |                             |
| SmaI-jomM       | ATAT <u>CCCGGG</u> CTGTGGGTCTAGCTGGCGG   | 1035-bp fragment containing <i>jomM</i> (-38 bp from start codon) for mutant complementation      | pSEJomM<br>(ΔM- pSEJomM)    |
| BamHI-jomM      | ATAT <u>GGATCCCC</u> GAGAGCTTGGTCAACGA   |                                                                                                   |                             |
| EcoRI-KanR      | TATA <u>GAATTC</u> GAAATCTCGTGATGGCAGGT  | 930-bp fragment containing gene <i>aph(3) II</i> (-86 bp from start codon) for pSETk construction | pSETk<br>(G- pSETk)         |
| EcoRV-KanR      | TATA <u>GATATC</u> TTTCTTGCCGCCAAGGATCT  |                                                                                                   |                             |

**Table S1.** Primers and plasmids used in this work (continued)

| Primer                          | Sequence (5'-3')                                              | PCR product and purpose                                                                                       | Plasmid<br>(related strain)                  |
|---------------------------------|---------------------------------------------------------------|---------------------------------------------------------------------------------------------------------------|----------------------------------------------|
| JAs BGC heterologous expression |                                                               |                                                                                                               |                                              |
| XhoI-2TAR                       | TATA <u>CTCGAG</u> CTTAGGGCTCGCCACCAC                         | 1081-bp arm flanking JAs BGC (left) for capture by TAR cloning                                                | <b>pCL2-CAP</b><br>(Sc-pJATAR and Sa-pJATAR) |
| NsiI-U2TAR                      | TATA <u>ATGCAT</u> AGCTCATGGGACTGAACACC                       |                                                                                                               |                                              |
| NsiI-L2TAR                      | TATA <u>ATGCAT</u> GAGCGTGATCATGACGAGGT                       | 945-bp arm flanking JAs BGC (right) for capture by TAR cloning                                                |                                              |
| SpeI-2TAR                       | TATA <u>ACTAGT</u> TGGTGTTGATCACCCACAAT                       |                                                                                                               |                                              |
| dApra-pErm                      | caggttcttagggcaggcgaccgtcctctcggtcgcatTTTTCTACGGGGTCTGACGC    | Amplification of a <i>aac(3)IV-ermE*</i> assembled fragment to be inserted upstream of <i>jomP1</i> at pJATAR | <b>pNTARe</b><br>(Sc-pJATARe and Sa-pJATARe) |
| dApra                           | TTTTCTACGGGGTCTGACGC                                          |                                                                                                               |                                              |
| NsiI-rvApra                     | TATA <u>ATGCAT</u> TCGTTAGTCGGAGGCCAAAC                       |                                                                                                               |                                              |
| dNsiI-pErm                      | TATA <u>ATGCAT</u> GTAAAACGACGGCCAGTGC                        |                                                                                                               |                                              |
| rvApra-pErm                     | tcaccggcggtcttcattcaacatccccaatttcatgaagtTACGAATTCGATATCGCGCG |                                                                                                               |                                              |
| rvpErm                          | TACGAATTCGATATCGCGCG                                          |                                                                                                               |                                              |
| Mutant confirmation             |                                                               |                                                                                                               |                                              |
| apraI                           | TGAGAAGCTGACCGATGAGCTC                                        | reverse primer annealing <i>aac(3)IV</i>                                                                      |                                              |
| apraII                          | GAGCTCATCGGTCAGCTTCTCA                                        | forward primer annealing <i>aac(3)IV</i>                                                                      |                                              |
| dcfErm                          | CGGTTGGTAGGATCCAGACCTG                                        | Confirmation of <i>ermE*</i> insertion upstream of <i>jomP1</i>                                               |                                              |
| rvcfErm                         | GAACCTGTGAGGCCAGCGA                                           |                                                                                                               |                                              |
| cfP1up                          | GGAAGTGAAGGTGGTGCTGT                                          | used with apraI for confirmation of <i>jomP1</i> interruption with pJomP1                                     |                                              |
| cfP1dw                          | CAGGTGGAAGTAGTCGTCCTCG                                        | used with apraII for confirmation of <i>jomP1</i> interruption with pJomP1                                    |                                              |
| cfNup                           | TCCTCGTACCACTGGAAGAGA                                         | used with apraI for upstream confirmation of <i>jomN</i> interruption with pJomN                              |                                              |
| cfNdw                           | GAGAACTCCACCTGCCATTCT                                         | used with apraII for downstream confirmation of <i>jomN</i> interruption with pJomN                           |                                              |
| cf8up                           | CGGTTGTTGGGCGACTTGATC                                         | used with apraI for upstream confirmation of <i>orf8</i> deletion                                             |                                              |
| cf8dw                           | CTTCAGGTACGGGGTGTGATC                                         | used with apraII for downstream confirmation of <i>orf8</i> deletion                                          |                                              |
| cf9up                           | CTTCGATCCTGGTGATCCGCC                                         | used with apraI for upstream confirmation of <i>orf9</i> deletion                                             |                                              |
| cf9dw                           | TCCCTTGATGCCAGCTGTAGAC                                        | used with apraII for downstream confirmation of <i>orf9</i> deletion                                          |                                              |

**Table S1.** Primers and plasmids used in this work (continued)

| Primer                     | Sequence (5'-3')       | PCR product and purpose                                               |
|----------------------------|------------------------|-----------------------------------------------------------------------|
| <b>Mutant confirmation</b> |                        |                                                                       |
| cf16up                     | AGGAATGGCAGGTGGAGTTCTC | used with apraI for upstream confirmation of <i>orf16</i> deletion    |
| cf16dw                     | AGCACAAAAACGGAGCAGGTTG | used with apraII for downstream confirmation of <i>orf16</i> deletion |
| cf20up                     | CCATGAACTCGATGGGCAGGTA | used with apraI for upstream confirmation of <i>orf20</i> deletion    |
| cf20dw                     | TCTCGTCGGTGATGTGCTTGAT | used with apraII for downstream confirmation of <i>orf20</i> deletion |
| cf29up                     | GAAAATGCCGTATCCGCCGTAG | used with apraI for upstream confirmation of <i>orf29</i> deletion    |
| cf29dw                     | CCTCCATATCGGCGATGGTCTT | used with apraII for downstream confirmation of <i>orf29</i> deletion |
| cf31up                     | CGGATACCGTGGTGCCATAGG  | used with apraI for upstream confirmation of <i>orf31</i> deletion    |
| cf31dw                     | CTCGATCGAGGACTGCGAGTTC | used with apraII for downstream confirmation of <i>orf31</i> deletion |
| cfMup                      | ATCCTGCTGGACGAACAGACC  | used with apraI for upstream confirmation of <i>jomM</i> deletion     |
| cfMdw                      | CTCTTCATCGGCAACCACTT   | used with apraII for downstream confirmation of <i>jomM</i> deletion  |

**Figure S27. Confirmation by PCR amplification of *S. caniferus* GUA-06-05-006A derivative strains generated in this work.** Recombinant strain (RS) G-pErm\* and mutant strains (M) were subjected to colony PCR with the indicated primer pairs (see table S1). In all cases a negative PCR control (WT) consisting in wild type *S. caniferus* GUA-06-05-006A DNA was processed. Band sizes were compared with 0.1 µg of lambda/PstI DNA marker.

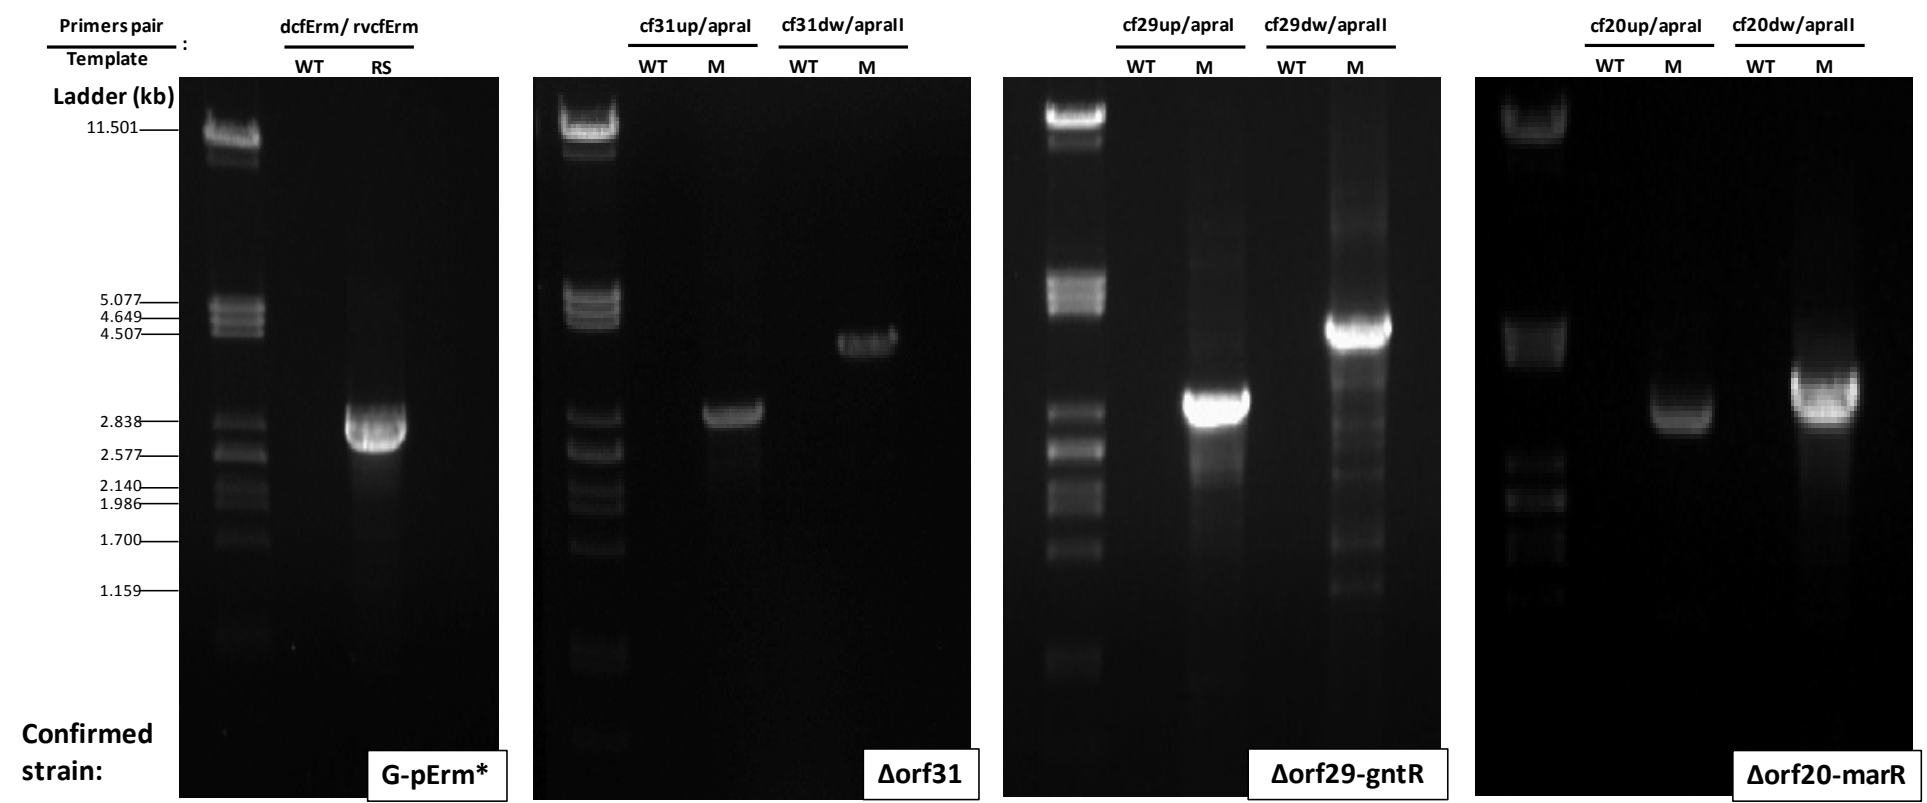

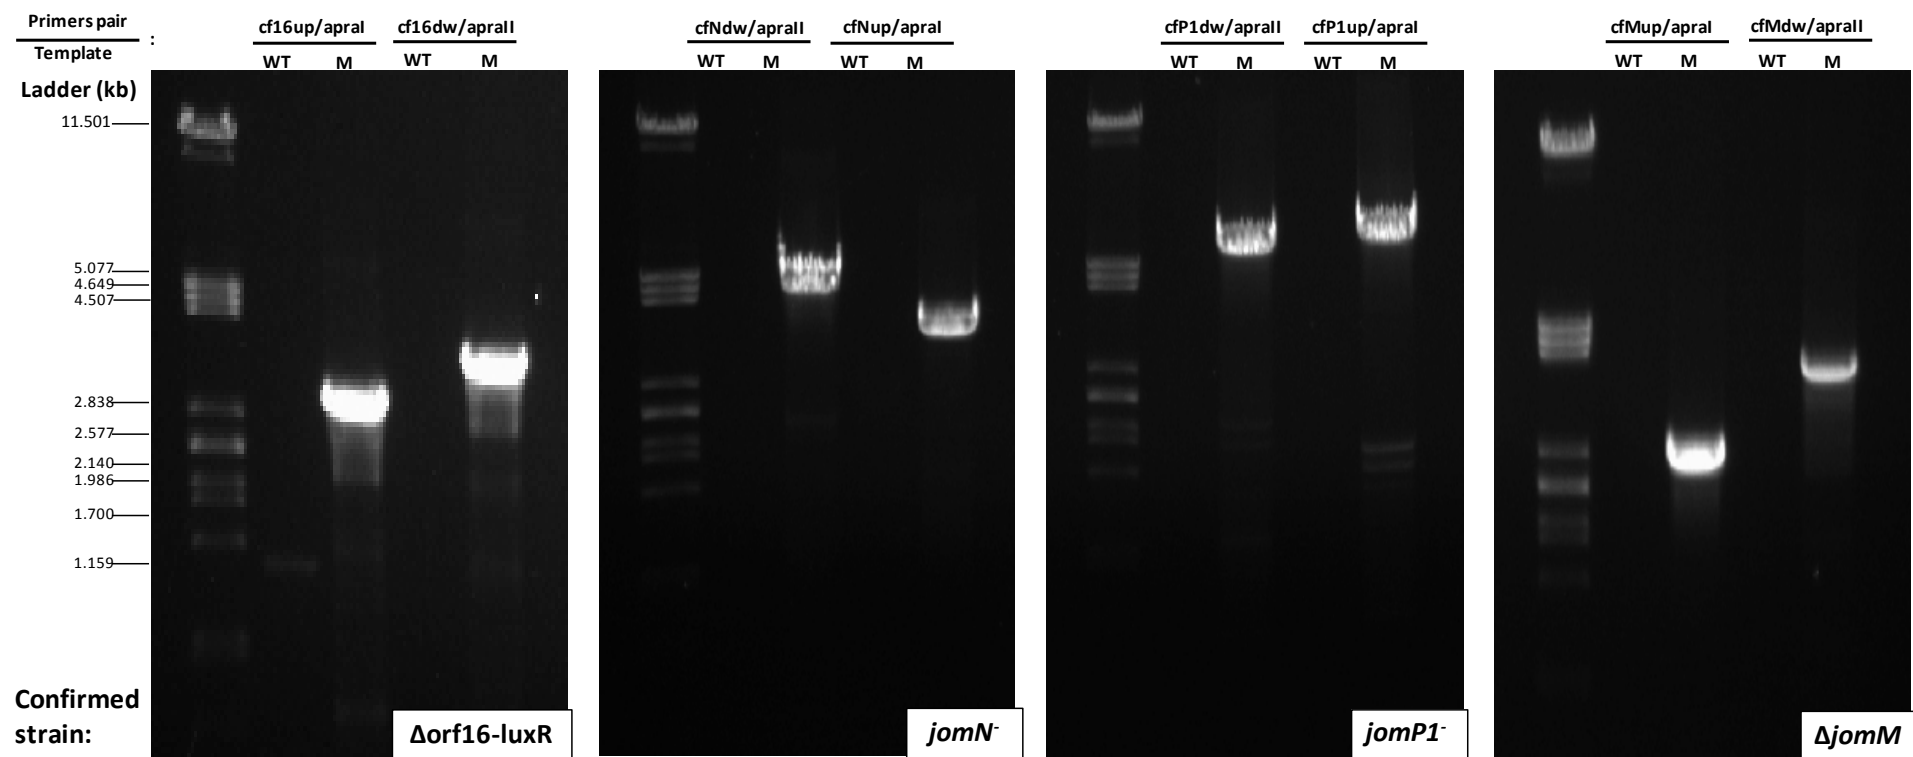

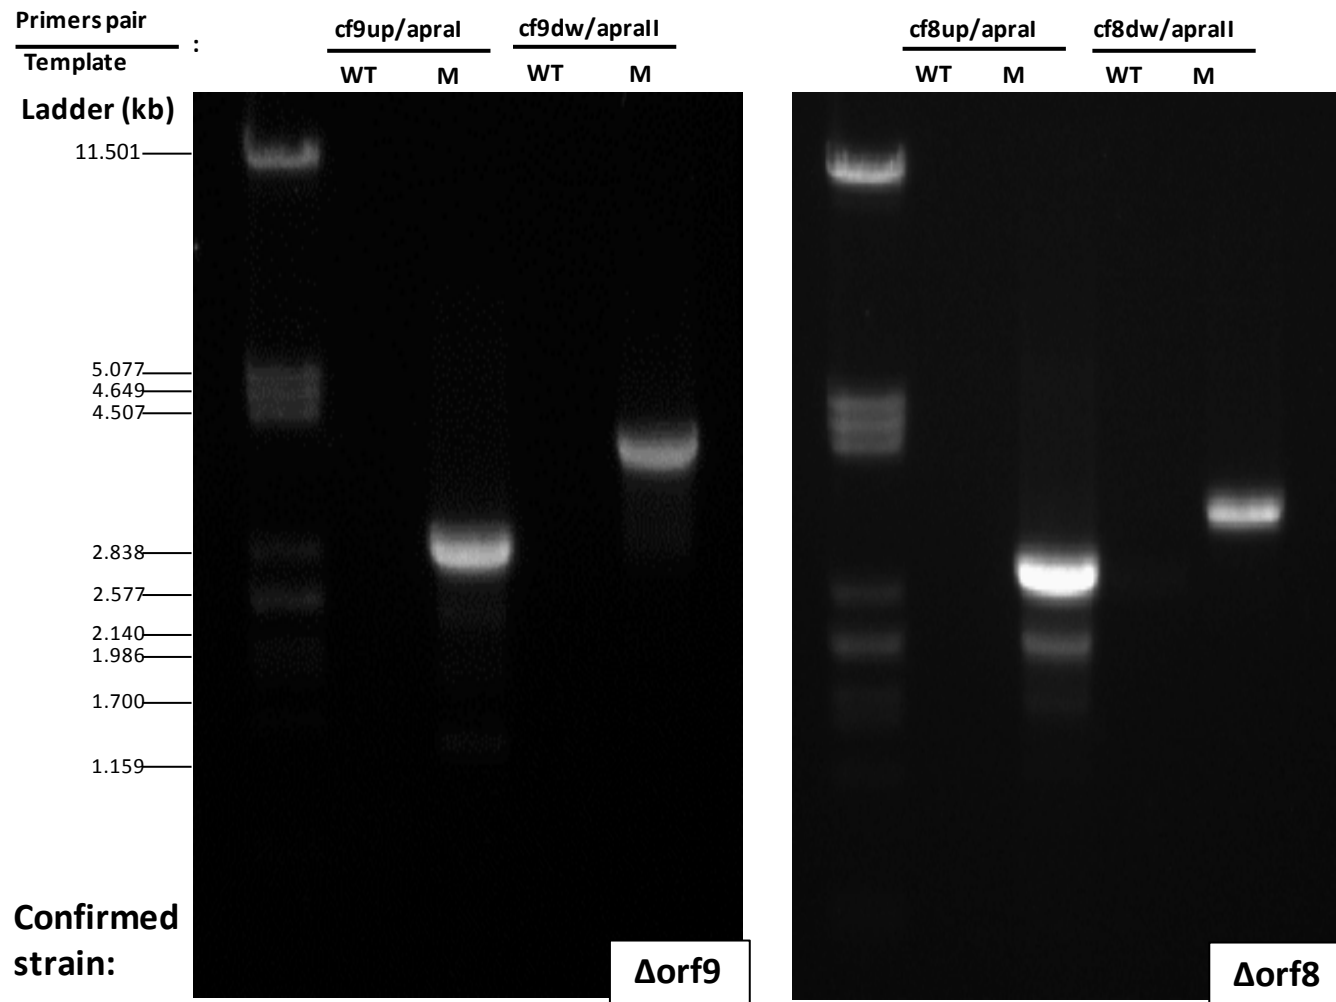

Supplement: Supplementary file 1 [file marinedrugs-16-00259-s001.zip › Supplementary file 3.pdf]
