# Supplementary material for: Characterization of the Jomthonic Acids Biosynthesis Pathway and Isolation of Novel Analogues in Streptomyces caniferus GUA-06-05-006A
Source: Mar Drugs. 2018 Jul 31;16(8):259. doi: 10.3390/md16080259 (PMC6117699; doi:10.3390/md16080259)
Supplement: Supplementary file 1 [file marinedrugs-16-00259-s001.zip › Supplementary file 2.pdf]

**Figure S22. Alignment of JomP1 AT<sub>2</sub> conserved sequences with other acyltransferase domains.** StiA\_AT1, StiA\_AT2 and StiC\_AT: stimatellin biosynthesis [1] and MxaF\_AT1 and MxaF\_AT2: myxalamid biosynthesis in *S. aurantica* Sga15 [2].

|                  |                        |
|------------------|------------------------|
| JomP2_AT         | GQASQY...GHSVGE...HAFH |
| StiC_AT          | GQGSQY...GHSVGE...HAFH |
| JomP1_AT2        | GQGGHT...GHSAGE...YPSH |
| MxaF_AT1         | GHGSQW...GHSIGE...VAVH |
| StiA_AT1         | GTGSQW...GHSIGE...TPSH |
| JomP1_AT1        | GQGSQW...GHSLGE...VASH |
| StiA_AT2         | GQGSQW...GHSMGE...VASH |
| MxaF_AT2         | GQGSQW...GHSMGE...VASH |
| <b>Consensus</b> | GqgSQw...GHSxGE        |

**Figure S23. Genetic complementation of mutant  $\Delta jomM$ .** UPLC analysis of jomthonic acids production in  $\Delta jomM$  and complemented strain  $\Delta M$ -pSEJomM.

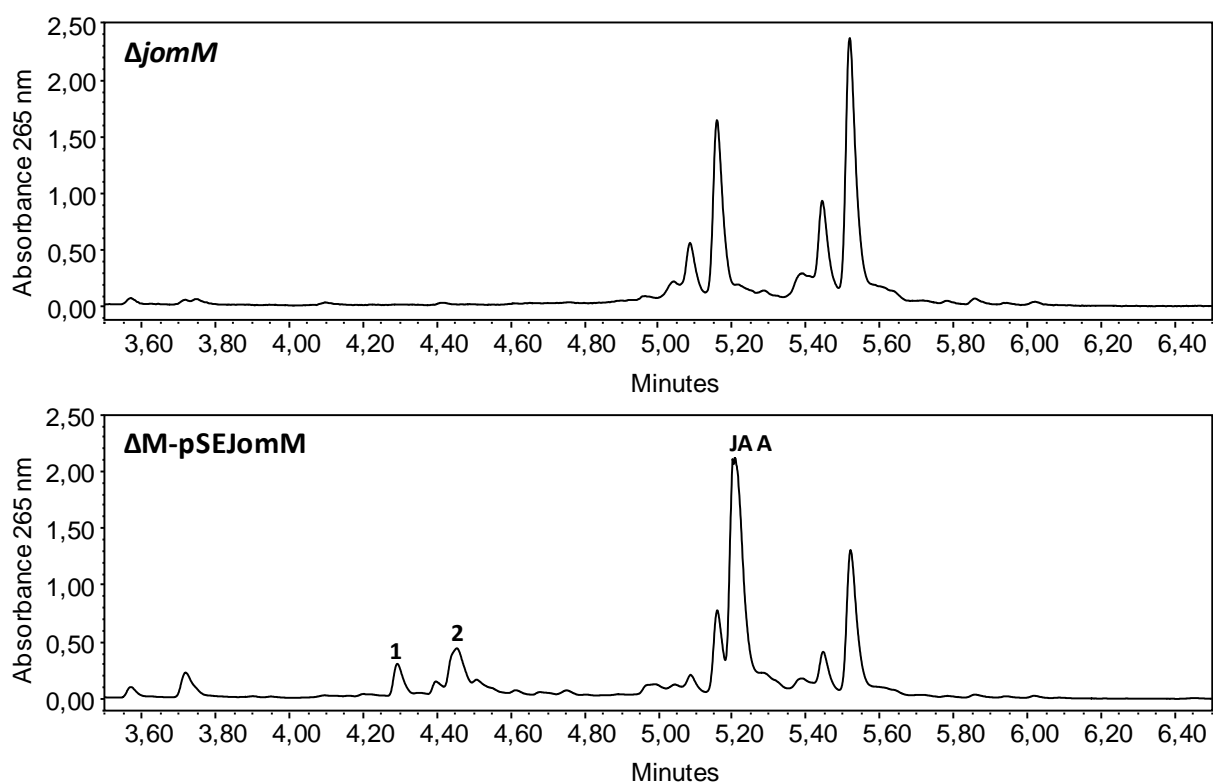

Figure S24. Mass spectra of compounds 1<sup>a</sup>-2<sup>a</sup>.

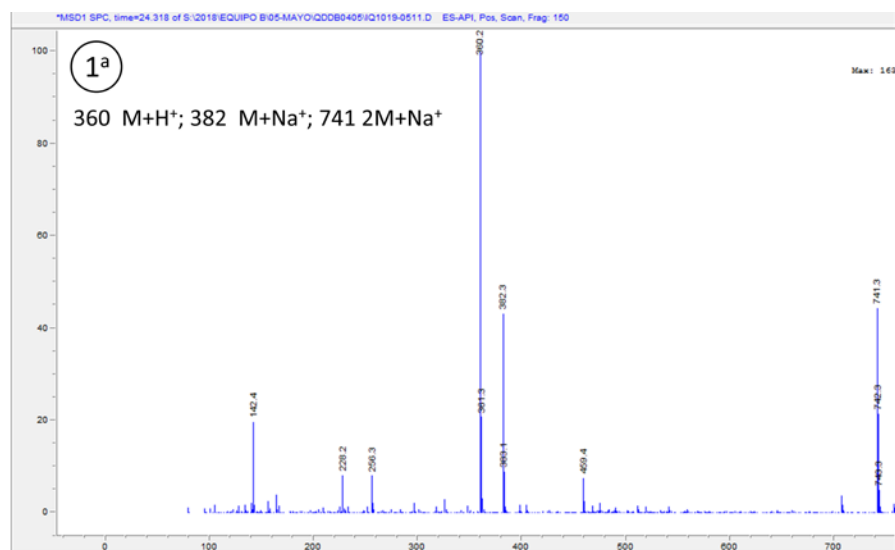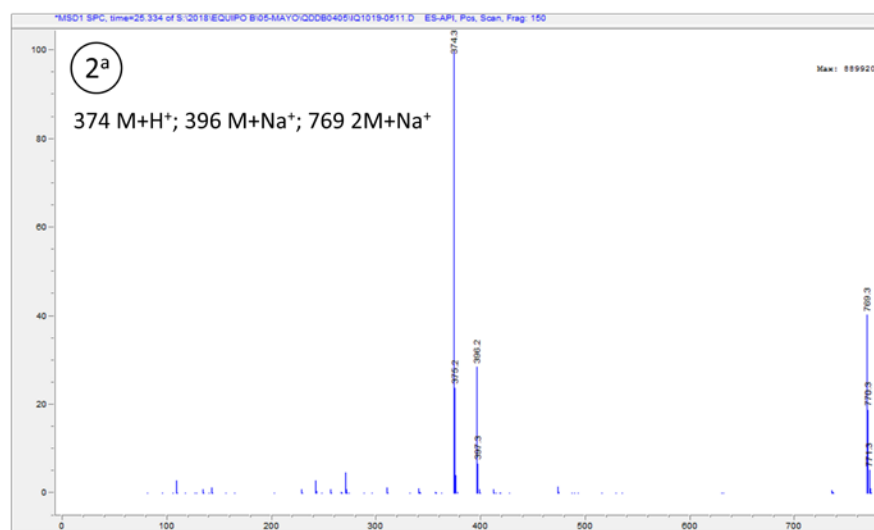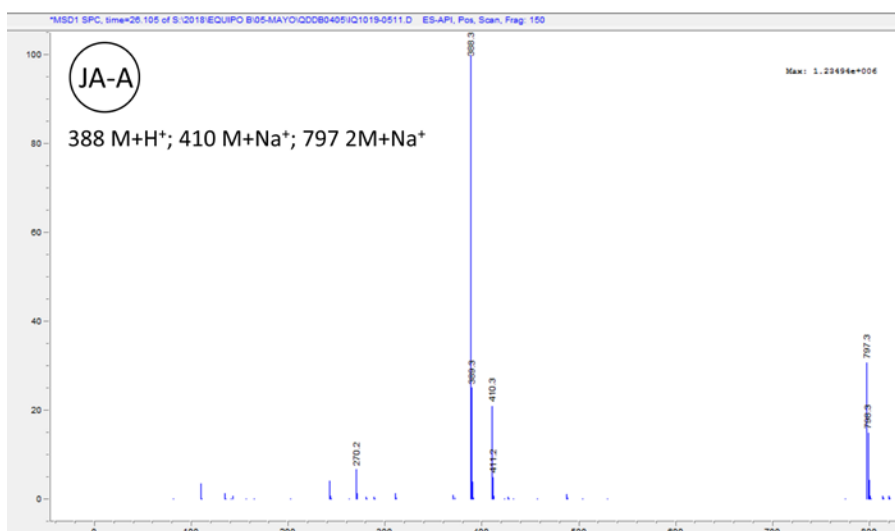

**Figure S25. Identification of additional potential jomthonic acids.** A) UPLC analysis of 5-fold concentrated extracts from *G-permE\**. B) Mass spectra of four additional compounds with jomthonic acid absorption spectra. Based on mass spectra, a tentative chemical structure is suggested for compound **b** and **d**.

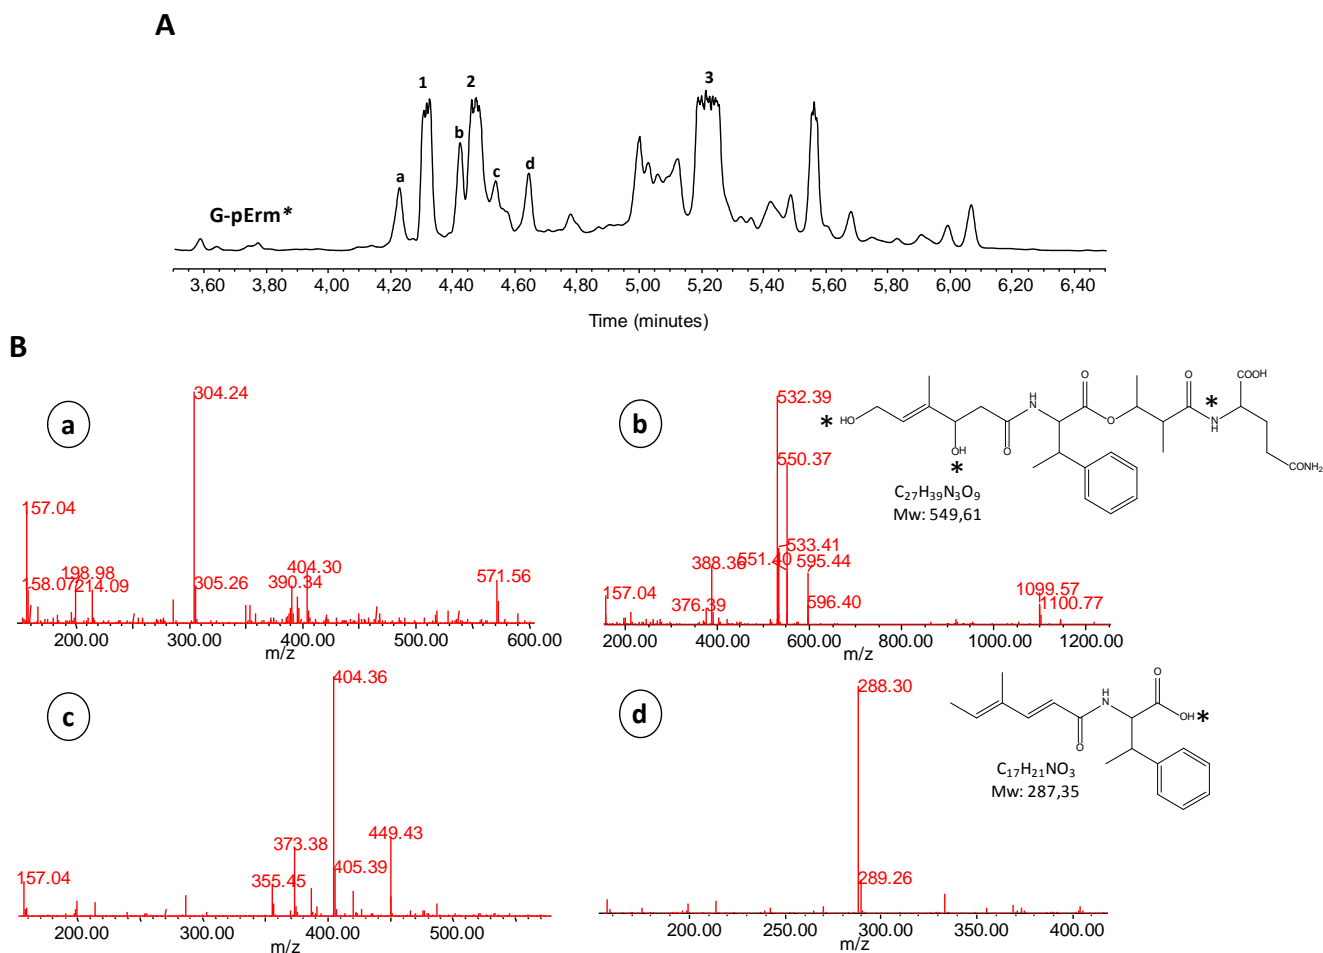

**Figure S26. Alternative biosynthesis model of the JAs polyketide chain.** JomP1AT<sub>1</sub> transfer the starting unit malonil-CoA and AT<sub>2</sub> catalyzes an extension with methylmalonil-CoA. A dehydration reaction (+DH) is required to achieve the final structure of the polyketide chain present in JA A.

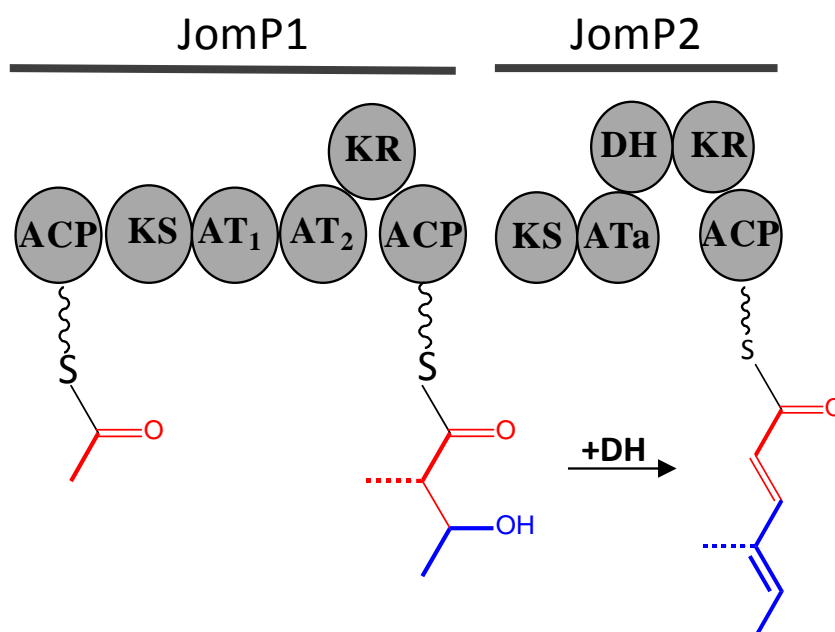

## References

1. Gaitatzis, N.; Silakowski, B.; Kunze, B.; Nordsiek, G.; Blöcker, H.; Höfle, G.; Müller, R. The biosynthesis of the aromatic myxobacterial electron transport inhibitor stigmatellin is directed by a novel type of modular polyketide synthase. *J. Biol. Chem.* **2002**, 277, 13082–90, doi:10.1074/jbc.M111738200.
2. Silakowski, B.; Nordsiek, G.; Kunze, B.; Blöcker, H.; Müller, R. Novel features in a combined polyketide synthase/non-ribosomal peptide synthetase: the myxalamid biosynthetic gene cluster of the myxobacterium *Stigmatella aurantiaca* Sga15. *Chem. Biol.* **2001**, 8, 59–69.
